# Calmodulin binds to the N-terminal domain of the cardiac sodium channel Na<sub>v</sub>1.5

Zizun Wang<sup>1\*</sup>, Sarah H. Vermij<sup>1\*</sup>, Valentin Sottas<sup>1,2</sup>, Anna Shestak<sup>3</sup>, Daniela Ross-Kaschitza<sup>1</sup>,  
Elena V. Zaklyazminskaya<sup>3</sup>, Andy Hudmon<sup>4</sup>, Geoffrey S. Pitt<sup>5</sup>, Jean-Sébastien Rougier<sup>1</sup> and Hugues Abriel<sup>1#</sup>

## AFFILIATIONS

<sup>1</sup>Institute of Biochemistry and Molecular Medicine, University of Bern, Bern, Switzerland

<sup>2</sup>Lonza BioPharma Ltd, Visp, Switzerland

<sup>3</sup>Petrovskiy Russian Scientific Center of Surgery, Moscow, Russia

<sup>4</sup>Department of Medicinal Chemistry and Molecular Pharmacology, College of Pharmacy, Purdue University, West Lafayette, Indiana, 47907, USA

<sup>5</sup>Cardiovascular Research Institute, Weill Cornell Medical College, New York, USA

\* These authors contributed equally

## # CORRESPONDENCE

Prof. Dr. Hugues Abriel, MD PhD

University of Bern, Institute of Biochemistry and Molecular Medicine

Bühlstrasse 28, CH-3012 Bern, Switzerland

Phone: +41 31 631 31 86

Twitter: @swissionchannel

Email: Hugues.Abriel@ibmm.unibe.ch

## KEYWORDS

Calmodulin; Sodium channels; SCN5A; Na<sub>v</sub>1.5 N-terminal domain; Brugada syndrome; Dominant-negative effect

This article was submitted to BioRxiv.org on 2 June 2020

1 **ABSTRACT**

2 The cardiac voltage-gated sodium channel Nav1.5 conducts the rapid inward sodium current crucial for  
3 cardiomyocyte excitability. Loss-of-function mutations in its gene *SCN5A* are linked to cardiac arrhythmias  
4 such as Brugada Syndrome (BrS). Several BrS-associated mutations in the Nav1.5 N-terminal domain exert  
5 a dominant-negative effect (DNE) on wild-type channel function, for which mechanisms remain poorly  
6 understood. We aim to contribute to the understanding of BrS pathophysiology by characterizing three  
7 mutations in the Nav1.5 N-terminal domain (NTD): Y87C—here newly identified—, R104W and R121W. In  
8 addition, we hypothesize that the calcium sensor protein calmodulin is a new NTD binding partner.

9 Recordings of whole-cell sodium currents in TsA-201 cells expressing WT and variant Nav1.5 showed that  
10 Y87C and R104W but not R121W exert a DNE on WT channels. Biotinylation assays revealed reduction  
11 in fully glycosylated Nav1.5 at the cell surface and in whole-cell lysates. Localization of Nav1.5 WT channel  
12 with the ER however did not change in the presence of variants, shown by transfected and stained rat  
13 neonatal cardiomyocytes. We next demonstrated that calmodulin binds Nav1.5 N-terminus using *in silico*  
14 modeling, SPOTS, pull-down and proximity ligation assays. This binding is impaired in the R121W variant  
15 and in a Nav1.5 construct missing residues 80-105, a predicted calmodulin binding site.

16 In conclusion, we present the first evidence that calmodulin binds to the Nav1.5 NTD, which seems to be a  
17 determinant for the DNE.

| 18 | <b>ABBREVIATIONS</b>     |                                        |
|----|--------------------------|----------------------------------------|
| 19 | BrS                      | Brugada syndrome                       |
| 20 | CaM                      | Calmodulin                             |
| 21 | Ca <sub>v</sub> channels | Voltage-gated calcium channels         |
| 22 | CTD                      | C-terminal domain                      |
| 23 | DNE                      | Dominant negative effect               |
| 24 | ECG                      | Electrocardiogram                      |
| 25 | ICD                      | Implantable cardioverter defibrillator |
| 26 | I <sub>Na</sub>          | Sodium current                         |
| 27 | LQT                      | Long-QT syndrome                       |
| 28 | MI                       | Myocardial infarction                  |
| 29 | Na <sub>v</sub> channels | Voltage-gated sodium channels          |
| 30 | NTD                      | N-terminal domain                      |
| 31 | PLA                      | Proximity Ligation Assay               |
| 32 | RNC                      | Rat neonatal cardiomyocytes            |

## INTRODUCTION

33  
34 Brugada syndrome (BrS) is a genetic cardiac arrhythmia, affecting 1 in 2000 people worldwide<sup>1</sup>, mostly  
35 men with structurally normal hearts<sup>2,3</sup>. BrS is characterized by an ST-segment elevation in the right  
36 precordial ECG leads without evidence of ischemia, and patients are at increased risk of ventricular  
37 fibrillation and sudden cardiac death<sup>4</sup>. Approximately 20% of BrS cases are associated with mutations in  
38 *SCN5A*, the gene encoding the voltage-gated sodium channel Nav1.5<sup>5</sup>.

39 Nav1.5 is crucial for cardiac excitability as it conducts a rapid inward depolarizing sodium current ( $I_{Na}$ ) in  
40 cardiomyocytes, shaping the rapid upstroke of the action potential<sup>6</sup>. BrS-associated *SCN5A* pathogenic  
41 variants typically confer a loss of Nav1.5 function by affecting channel gating or trafficking, slowing the  
42 action potential upstroke and cardiac conduction<sup>7</sup>. In addition, several BrS variant channels confer a  
43 dominant-negative effect (DNE) in cellular expression systems. The DNE is defined as variant channels  
44 negatively regulating WT channels<sup>8</sup>. As such, when variant and wild-type channels are co-expressed in  
45 cells, the peak sodium current ( $I_{Na}$ ) is less than 50% of that in wild-type conditions. The first *SCN5A* BrS  
46 variant conferring a DNE (L325R) was described by Keller *et al.*<sup>9</sup>. Since then, several variant channels in  
47 the Nav1.5 N-terminus domain (NTD) have been shown to exert a DNE on WT channels, including R104W  
48 and R121W<sup>10,11</sup>.

49 The mechanisms underlying the DNE of NTD Nav1.5 variants remain unknown. Channel-channel  
50 interactions seem to be crucial for the DNE phenomenon, which is likely mediated by Nav1.5 interacting  
51 proteins<sup>10,12</sup>. Only when we identify molecular mediators of the DNE at the NTD, we can explain the  
52 functional heterogeneity of NTD variants and ultimately identify therapeutic targets for BrS patients. In this  
53 study, we aim to elucidate the mechanisms underlying the DNE of the three N-terminal mutants Y87C,  
54 R104W and R121W. We hypothesize that the calcium-binding protein calmodulin (CaM) is a yet-unknown  
55 N-terminal interaction partner. CaM is well-known to regulate voltage-gated sodium (Nav) and calcium  
56 (Cav) channel functions<sup>13,14</sup>. Its interaction with Nav and Cav C-terminal domains (CTD) is especially well  
57 established<sup>13,15</sup>. In the Cav1.2 NTD, two CaM binding sites have been described<sup>16,17</sup>, while CaM interaction  
58 with the Nav1.5 NTD remains unexplored.

59 Here, in BrS probands of a Russian family, we identify the new Nav1.5 NTD variant Y87C, which exerts a  
60 DNE on WT channel function. Using the TsA-201 cell expression system in patch-clamp and biochemistry  
61 experiments, we confirm R104W exerts a DNE, but R121W surprisingly does not. CaM is identified as a  
62 new Nav1.5 N-terminal binding partner. CaM binds WT, Y87C, and R104W NTDs, but only weakly to  
63 R121W NTD and NTD lacking amino acids 80-105. As such, the ability of CaM to bind the Nav1.5 NTD  
64 correlates with the occurrence of the DNE. Lastly, we show a reduction in fully glycosylated bands of all  
65 three Nav1.5 variants compared to WT both at the surface and in whole-cell lysates.

66

## METHODS

### 67 GENETIC ANALYSES

68 We obtained the informed consent from probands and their family members for genetic investigations in accordance with the  
69 Helsinki declaration. For the *SCN5A* gene, coding and adjacent intronic areas were sequenced using PCR-based bi-directional  
70 Sanger sequencing. The prevalence of the rare genetic variant c.206A>G(Y87C) was determined using allele-specific PCR in an  
71 ethnically matched group of 150 healthy volunteers, and in the public database gnomAD (<https://gnomad.broadinstitute.org/>).  
72 Pathogenicity assessment was performed in accordance with ACMG guidelines (2015)<sup>18</sup>. The potential effect of the variant was  
73 tested *in silico* using PolyPhen2.0 (<http://genetics.bwh.harvard.edu/pph2/>), Provean (<http://provean.jcvi.org/>), and MutationTaster  
74 (<http://www.mutationtaster.org/>) tools.

### 75 cDNA CONSTRUCTS, CELL CULTURE, AND TRANSFECTIONS

76 In the cDNA templates pcDNA3.1-*SCN5A*-WT, pcDNA3.1-S-tag-*SCN5A*-WT-NTD (a kind gift from Dr. Nathalie Neyroud,  
77 INSERM, Paris, France), and pcDNA3.1-3X-FLAG-*SCN5A*-WT, the following Nav1.5 variants were introduced (GenScript, NJ,  
78 USA): Y87C, R104W, R121W, and  $\Delta$ 26, in which amino acid residues 80-105 were deleted. S-tag-*SCN5A*-WT-NTD encodes the  
79 131-amino-acid-long Nav1.5 NTD. The Cav1.2-WT-NTD and the homologous Cav1.2-R144W-NTD constructs were generated by  
80 replacing the *SCN5A* sequence in the pcDNA3.1-S-tag-*SCN5A*-WT-NTD cDNA with the Cav1.2 NTD sequence. Nav1.5-encoding  
81 cDNA corresponded to the transcript NM\_000335.5 (human; Genbank) with the amino acid variant T559A, for which no functional  
82 consequences have been reported. Cav1.2-encoding cDNA corresponded to X15539.1 (cardiac isoform, rabbit; Genbank). Primers  
83 designed for mutagenesis are available upon request. All cDNAs were validated by sequencing.

84 We obtained human embryonal kidney (Tsa-201) and monkey kidney cells (COS) from the American Type Culture Collection  
85 (ATCC, VA, USA). Cells were cultured at 37°C with 5% CO<sub>2</sub> in Dulbecco's modified Eagle's culture medium (Gibco, Thermo  
86 Fisher Scientific, MA, USA), which we supplemented with 2 mM glutamine and 10% heat-inactivated fetal bovine serum. Cells  
87 were kept in culture up to 20 passages for experimental use. All transfections were performed with JET PEI (Polyplus Transfection,  
88 Illkirch, France) following the manufacturer's instructions.

89 For electrophysiological recordings, we cultured Tsa-201 cells in 35 mm petri dishes. We transfected with 128 ng *SCN5A* cDNA  
90 to mimic a non-saturated homozygous state. To mimic the heterozygous state, cells were co-transfected with 64 ng pcDNA3.1-  
91 *SCN5A*-WT and 64 ng of a pcDNA3.1-*SCN5A* variant (Y87C, R104W, R121W, or  $\Delta$ 26) or empty vector (pcDNA3.1-Zeo(+)). All  
92 transfections additionally contained 64 ng pIRES-h $\beta$ 1-CD8 cDNA, encoding the human sodium channel  $\beta$ 1-subunit and the CD8  
93 receptor.

94 For biochemical experiments, we cultured Tsa-201 cells in 100 mm petri dishes. To assay cell surface biotinylation, we transfected  
95 cells with 768 ng pcDNA3.1-*SCN5A*-WT or one of the selected variants, and 364 ng pIRES-h $\beta$ 1-CD8. For calmodulin pull-down  
96 experiments, we transfected cells with 2  $\mu$ g pcDNA3.1-S-tag-*SCN5A*-WT-NTD or one of the selected variants.

97 For proximity ligation assays (PLAs), we cultured COS cells in  $\mu$ -Slide 8-Well Grid-500 ibiTreat (ibidi, Gräfelfing, Germany) and  
98 transfected them with 120 ng pcDNA3.1-S-tag-*SCN5A*-WT-NTD, one of the variants (Y87C, R104W, R121W, or  $\Delta$ 26), or empty  
99 vector.

### 100 RAT NEONATAL CARDIOMYOCYTE ISOLATION, CULTURE, AND TRANSFECTION

101 All institutional experimental guidelines for animal handling were met. The Veterinary Office of the Canton of Bern, Switzerland,  
102 approved our experiments. We isolated primary rat neonatal cardiomyocytes (RNCs) and cultured them at 37°C with 1% CO<sub>2</sub>.<sup>19</sup>  
103 RNCs were seeded on laminin-coated (Sigma, MO, USA)  $\mu$ -Slide 8 Well Grid-500 ibiTreat dishes (ibidi). Cells were transfected  
104 24 h after cell seeding using Lipofectamine 3000 (Invitrogen, CA, USA) To study the subcellular localization of Nav1.5 full-length  
105 channels in the homozygous state, we transfected RNCs with 400 ng pcDNA3.1-3X-FLAG-*SCN5A*-WT or one of the variants

106 Y87C, R104W, or R121W. To study their subcellular localization in the heterozygous state, we transfected RNCs with 200 ng  
107 pcDNA3.1-GFP-SCN5A-WT and 200 ng of one of the variants. All conditions additionally contained 100 ng pDsRed2-ER (Takara  
108 Clontech, Kusatsu, Japan) as an endoplasmic reticulum (ER) marker.

## 109 **CALMODULIN BINDING PREDICTION**

110 To computationally predict CaM binding to Nav1.5 NTD, we used the CaM target database ([http://calcium.uhnres.utoronto.ca/ctdb/](http://calcium.uhnres.utoronto.ca/ctdb/ctdb/sequence.html)  
111 [ctdb/sequence.html](http://calcium.uhnres.utoronto.ca/ctdb/ctdb/sequence.html)). Scores are normalized on a scale from 0 to 9, 0 being low and 9 being high probability of CaM binding.

## 112 **BIOCHEMICAL EXPERIMENTS**

### 113 **Peptide SPOTS array**

114 Peptides were synthesized using standard 9-fluorenylmethoxy carbonyl (Fmoc) protected and activated amino acids (Anaspec, CA,  
115 USA) on prederivatized cellulose membranes (Intavis AG, Cologne, Germany) using an Intavis robot.<sup>20</sup> Human Nav1.5 (Q14524  
116 (SCN5A\_Human) isoform 1) N-terminal domain 1-131 was tiled as 15 amino acid peptides with a 13-amino acid overlap (two  
117 amino acids skipped between consecutive peptides). The membrane was briefly wet with dimethylformamide (DMF) and peptides  
118 were labeled with bromophenol blue (1%) for annotation of the array pattern at the completion of synthesis as described  
119 previously.<sup>20,21</sup> The peptides on the array were then de-protected with two washes of 88% trifluoroacetic acid, 2% triisopropylsilane,  
120 5% phenol and 5% water, for 90 min each at room temperature. Each de-protection step was followed by three washes with  
121 dichloromethane, three washes with DMF, and three washes with ethanol and the membranes dried. Before binding experiments,  
122 the membrane was wet by exposure to ethanol for 15 min, followed by DMF for 15 min and three 15 min washes with phosphate-  
123 buffered saline (PBS), all while shaking at room temperature. The hydrated membrane was then equilibrated for 30 min in 20 mM  
124 Tris-HCl pH 7.4, 200 mM NaCl, 1 mM EDTA, and 0.1% Tween-20, before the membrane was blocked in the same buffer plus 5%  
125 bovine serum albumin (BSA) for 30 min. The binding buffer used in the CaM binding reaction was identical to membrane  
126 equilibration buffer, except 5 mM EGTA was included in the buffer along with 100 nM of DyLight680-labelled CaM; mutant Cys-  
127 75 CaM purified as described previously<sup>22,23</sup> and labeled with a sulfhydryl reactive maleimide fluorophore as described by the  
128 manufacturer (Fisher #46618). After 5 min at room temperature, the apoCaM binding reaction was washed in binding buffer (3×15  
129 min including plus 5 mM EGTA) before the membrane was imaged using a Li-Cor Imaging Station (Li-Cor Biosciences, Bad  
130 Homberg, Germany).

### 131 **Cell surface biotinylation assay**

132 We used a cell surface biotinylation assay to study protein expression at the plasma membrane. 48 h after transfection, TsA-201  
133 cells transiently expressing Nav1.5 constructs were supplied with 0.5 mg/mL EZ-link™ Sulfo-NHS-SS-Biotin (Thermo Fisher  
134 Scientific) in PBS for 15 min at 4°C. Then we washed the cells twice with 200 mM glycine in cold PBS to inactivate and remove  
135 excess biotin, respectively. Cells were taken up in lysis buffer (composed of [mM] HEPES 50 pH 7.4, NaCl 150, MgCl<sub>2</sub> 1.5,  
136 EGTA 1 pH 8; 10% glycerol, 1% Triton X-100 (Tx100), Complete protease inhibitor [Roche, Basel, Switzerland]) for 1 h at 4°C.  
137 Cell lysates were centrifuged at 16,100 rcf at 4°C for 15 min. We determined protein concentration of the supernatant with Bradford  
138 assay (Bio-Rad)<sup>24</sup>, and incubated lysate equivalent to 2 mg of protein with 50 μL Streptavidin Sepharose High-Performance beads  
139 (GE Healthcare, IL, USA) for 2 h at 4°C, then washed the beads three times with lysis buffer, and eluted them with 30 μL of 2X  
140 NuPAGE sample buffer plus 100 mM DTT (37°C for 30 min). Input fractions were resuspended in NuPAGE Sample Buffer  
141 (Invitrogen) plus 100 mM dithiothreitol (DTT) and incubated at 37°C for 30 min.

## 142 **Calmodulin pull-down assay**

143 We used the calmodulin pull-down assay to determine whether Nav1.5 and Cav1.2 constructs bind calmodulin. 48 h after  
144 transfection, TsA-201 cells were lysed in lysis buffer with 100 nM free Ca<sup>2+</sup> for 1 hour at 4°C. The free Ca<sup>2+</sup> concentration was  
145 calculated based on an established method<sup>25</sup>. Lysed samples were centrifuged at 16,100 rcf at 4°C for 15 min. We quantified  
146 supernatant protein concentration with the Bradford assay. After washing calmodulin and control Sepharose 4B beads (GE  
147 Healthcare) twice with lysis buffer, we mixed lysate corresponding to 60, 180, or 540 µg protein with the beads. Beads and lysate  
148 mixture incubated at 4°C on a wheel for 3 hours. We washed the beads three times with lysis buffer and eluted proteins from the  
149 beads in 30 µL 2X NuPAGE sample buffer with 100 mM DTT at 55°C (15 min).

## 150 **SDS-Page and western blot**

151 Protein samples were loaded on pre-casted 4-12% Bis-Tris acrylamide gradient gels (Invitrogen), run at 60 V for 30 min and at 200  
152 V for 45-120 min, and transferred to nitrocellulose membranes (Bio-Rad, CA, USA) with the TurboBlot dry blot system (Bio-Rad).  
153 Western blots were performed with the SNAP i.d. system (Millipore, Zug, Switzerland). Briefly, membranes were blocked with 1%  
154 BSA, incubated with primary antibodies diluted in PBS + 0.1% Tween20 for 10 minutes, washed four times with PBS + 0.1%  
155 Tween20, incubated with secondary antibodies diluted in PBS + 0.1% Tween20, washed again four times with PBS + 0.1%  
156 Tween20 and three times with PBS. Fluorescent signals were detected on an Odyssey infrared imaging system (Li-Cor). We  
157 determined protein content by quantifying band fluorescence densities with the Image Studio Lite software version 5.2 (Li-Cor).

158 The following primary antibodies detected the proteins of interest: mouse anti- $\alpha$ -CaMKII (1:3000; BD, NJ, USA; 611292); rabbit  
159 anti- $\alpha$ -actin (1:3000, Sigma, A2066); mouse anti-S-tag (1:1500, Sigma, SAB2702204); rabbit anti-Nav1.5 (1:150, generated by  
160 Pineda, Berlin, Germany); and mouse anti-alpha-1 sodium-potassium ATPase (1:3000; Abcam, Cambridge, UK; ab7671).  
161 Secondary IRDye® antibodies (Li-Cor) were 680RD goat anti-mouse (1:15000; 926-68070), 800CW goat anti-mouse (1:15000;  
162 926-32210), and 800CW goat anti-rabbit (1:15000, 925-32211).

## 163 **QUANTITATIVE REAL-TIME PCR (RT-QPCR)**

164 We isolated total RNA from TsA-201 cells transiently expressing pcDNA3.1-hSCN5A-WT, Y87C, R104W, R121W, or  $\Delta$ 26 with  
165 TRIzol reagent (Invitrogen) following the manufacturer's instructions. We used 2 µg RNA for reverse transcription with the High-  
166 Capacity cDNA Reverse Transcription Kit (Applied Biosystems, CA, USA). The cDNA was diluted (1:10) in H<sub>2</sub>O for qPCR with  
167 the TaqMan Gene Expression Assay (Applied Biosystems). qPCR conditions in the ViiA 7 Real-Time PCR System (Thermo Fisher  
168 Scientific) were as follows: activation 2 min at 50°C; hold 20 s at 95°C; 40 cycles of denaturation 3 s at 95°C and annealing 60 s at  
169 60°C. We normalized the expression levels of human *SCN5A* (HS00165693\_m1) to the reference gene *GAPDH* (HS99999905\_m1),  
170 and then to the *SCN5A* WT expression using the  $2^{-\Delta\Delta C_t}$  method.<sup>26</sup>

## 171 **ELECTROPHYSIOLOGICAL RECORDINGS**

172 Whole-cell currents were recorded 48 hours after transfection using the patch-clamp technique with an Axopatch 200B amplifier  
173 (Molecular Devices, Wokingham, United Kingdom) at room temperature (25 ± 1°C).<sup>27</sup> The recorded  $I_{Na}$  was filtered at 5 kHz by a  
174 low-pass filter (HumBug, Quest Scientific, BC, Canada) at a sampling rate of 20 kHz per signal. Leak current subtraction was  
175 applied with a P/4 protocol. We used the DMZ-universal puller (program 10, Zeitz, Martinsried, Germany) to pull the patch pipettes  
176 (World Precision Instruments, Friedberg, Germany) to a resistance of 2.0 to 4.5 M $\Omega$ . The internal pipette solution contained (mM)  
177 CsCl 60, aspartic acid 50, CaCl<sub>2</sub> 1, MgCl<sub>2</sub> 1, HEPES 10, EGTA 11, Na<sub>2</sub>ATP 5. pH was adjusted to 7.2 with CsOH. The external  
178 solution contained (mM) NaCl 25, NMDG-Cl 105, CsCl 5, CaCl<sub>2</sub> 2, MgCl<sub>2</sub> 1.2, HEPES 10, glucose 20. pH was adjusted to 7.4  
179 with HCl.

180 We used the voltage clamp mode to obtain current-voltage relationships (I-V curves). Sodium current density (pA/pF) was  
181 calculated by dividing peak current by cell capacitance using the Axon™ pCLAMP™ 10 Electrophysiology Data Acquisition &  
Wang *et al.*

182 Analysis Software, Version 10.7.0.3 (Axon Instruments, CA, USA). I-V curves were fitted with the equation  $y = g(V_m - V_{rev}) / ((1$   
183  $+ \exp[(V_m - V_{1/2}) / K])$ ). Activation and steady-state inactivation (SSI) curves were fitted with the Boltzmann equation  $y = 1 / (1 +$   
184  $\exp[(V_m - V_{1/2}) / K])$ , where  $y$  is the normalized current or conductance at a given holding potential,  $V_m$  is the membrane potential,  
185  $V_{rev}$  is the reversal potential,  $V_{1/2}$  is the potential at which half of the channels are activated, and  $K$  is the slope factor.

## 186 IMMUNOFLUORESCENCE AND IMAGING

### 187 Immunocytochemistry

188 To investigate Nav1.5 subcellular localization, we performed immunocytochemistry on transiently transfected RNCs. Two days  
189 after transfection, RNCs were fixed with cold acetone at -20°C (10 min), washed three times with PBS, and permeabilized with  
190 blocking buffer (1% BSA, 0.5 % Tx100 and 10% normal goat serum in PBS) for 30 min at room temperature. Primary antibodies  
191 diluted 1:100 in incubation buffer (1% BSA, 0.5% Tx100 and 3% goat serum in PBS) were applied overnight at 4°C. We used the  
192 following primary antibodies: mouse anti-FLAG (Sigma) to detect FLAG-Nav1.5 and rabbit anti-GFP (Thermo Fisher, G10362) to  
193 detect GFP-Nav1.5. Then, cells were washed twice with PBS and incubated for 45 mins at room temperature with AlexaFluor  
194 secondary antibodies (goat anti-rabbit 405 (Thermo Fisher Scientific)) diluted 1:200 in incubation buffer. We stained the nuclei  
195 with DAPI or NucRed dead 647 ReadyProbes Reagent (2 drops/mL, Thermo Fisher Scientific). Mounting medium (EMS shield  
196 with Dabco; EMS, PA, USA) was added to preserve fluorescence signals.

### 197 Proximity ligation assay

198 To determine whether two proteins were close *in situ*, we performed PLAs using the Duolink® Starter Kit Mouse/Rabbit (Sigma)  
199 following the manufacturer's instructions. We transiently transfected COS cells with pcDNA3.1-S-tag-SCN5A-WT, -WT NTD and  
200  $\Delta 26$  NTD. 48 hours after transfection, we fixed them with acetone at -20°C for 10 min. The cells were washed three times with  
201 PBS before they were permeabilized with blocking buffer (1% BSA, 0.5 % Tx100 and 10% goat serum in PBS) for 30 min at room  
202 temperature. Cells were incubated with primary antibodies diluted in incubation buffer (1% BSA, 0.5% Tx100, and 3% goat serum  
203 in PBS) overnight at 4°C. We used the following primary antibodies: rabbit-anti-S-tag (for S-tagged NTD, 1:100, Abcam,  
204 ab180958) and mouse anti-calmodulin (1:100, Merck, 05-173); or mouse anti-S-tag (for S-tagged NTD, 1:1500, Sigma,  
205 SAB2702204) and rabbit anti-Nav1.5 (1:150, generated by Pineda, Berlin). After washing the cells 3X with PBS, we incubated  
206 them with anti-rabbit PLUS and anti-mouse MINUS PLA probes (1 hour at 37°C) diluted in Duolink® incubation buffer (1:200;  
207 Sigma), followed by three washes with PBS. We followed the manufacturer's instructions for probe ligation and signal  
208 amplification. Duolink® in situ mounting medium with DAPI was added to stain cell nuclei and preserve fluorescence signals.

### 209 Image acquisition and post-acquisition analysis

210 Confocal images were obtained with an inverted laser-scanning microscope (LSM 880, ZEN 2.1, Zeiss, Oberkochen, Germany)  
211 with a Plan-Apochromat 63X/1.40 Oil DIC objective. We collected COS cell images in the confocal mode and analyzed them with  
212 the Duolink® ImageTool (Sigma) following the manufacturer's instructions. RNC images were collected in the Airyscan super-  
213 resolution mode with the pinhole set at 1.25 Airy unit, pixel size was 35x35 nm. We used ZEN 2.1 software for processing raw  
214 Airyscan data, and the IMARIS coloc tool (IMARIS 9.3.1 software, Bitplane, Zürich, Switzerland) to quantify the colocalization  
215 between signals of two channels within the predefined ROI (region of interest, defined as the cell area). We set an automatic  
216 threshold per channel. If the automatic threshold could not be defined, we set the threshold at 30%.



217 **DATA AND STATISTICAL ANALYSIS**

218 Data are represented as means  $\pm$  SEM and are compared to the wild-type condition unless otherwise indicated. Statistical  
219 significance was calculated with 2-tailed Student's *t*-test if data were normally distributed or by the Mann-Whitney U-test if data  
220 were not (Prism version 7.04; GraphPad, CA, USA). We considered a *p*-value <0.05 to indicate a statistically significant difference.

221 **RESULTS**

222 **CLINICAL DESCRIPTION OF THE NEW NAV1.5 VARIANT Y87C IN BRS PATIENTS**

223 We identified the novel missense variant c.260A>G (Y87C) in exon 2 of the *SCN5A* gene in two family  
224 members of the Russian proband family and present their pedigree chart in **Supplementary Figure 1A**. We  
225 found this Y87C variant neither in 150 ethnically matched controls, nor in the public database gnomAD  
226 (<https://gnomad.broadinstitute.org/>). This substitution occurred at a highly conservative position of the NTD  
227 of Nav1.5 (**Supplementary Figure 1D**). Three independent *in silico* tools predicted that Y87C has a  
228 deleterious effect on protein function: in the absence of functional data it was qualified as a Class III (variant  
229 of unknown significance, VUS) variant.

230 The 49-year-old male proband (II.2) and his eldest son of 23 years (III.2) had a characteristic spontaneous  
231 Brugada pattern on their ECGs (**Supplementary Figure 1B**). His younger 13-year-old son (III.3) has not  
232 shown any syncope or Brugada pattern on his ECG (**Supplementary Figure 1C**), and did not undergo  
233 genetic testing yet. The proband's father (I.2) was unavailable; at the last report (age 65) he reported no  
234 syncope history. His granddaughter (IV.1) as well as his mother (I.2) have a normal ECG and no complaints.

235 The proband was asymptomatic without history of syncope or family history of sudden cardiac death. His  
236 ECG revealed a permanent spontaneous Brugada pattern, first-degree atrio-ventricular block (PR-interval  
237 up to 240 ms), and a negative T-wave in the V1 lead (**Supplementary Figure 1B**). During nine years of  
238 follow-up, the proband repeatedly complained of chest pain after alcohol consumption. Consequently, he  
239 was hospitalized several times with an initial diagnosis of acute myocardial infarction (MI), as his ECG  
240 showed an increasing elevation of the ST-segment; however, his ECGs never showed dynamic changes  
241 specific to MI, and troponin elevation or any other biochemical MI markers were never detected. His ECG  
242 went back to the usual Brugada-like shape within 1-2 days after alcohol abstinence. Proband underwent  
243 detailed clinical examination, and the only extracardiac complaint was endogenous depression for which he  
244 required medication for many years.

245 The eldest son of the proband had a spontaneous Brugada pattern similar to his father's. He had no syncope  
246 history. During nine years of follow-up, he remained sober and physically active.

247 Neither the proband nor his eldest son took any anti-arrhythmic medication or received any intervention.  
248 Taking into account the functional results, this variant was re-classified to Class IV (Likely pathogenic).

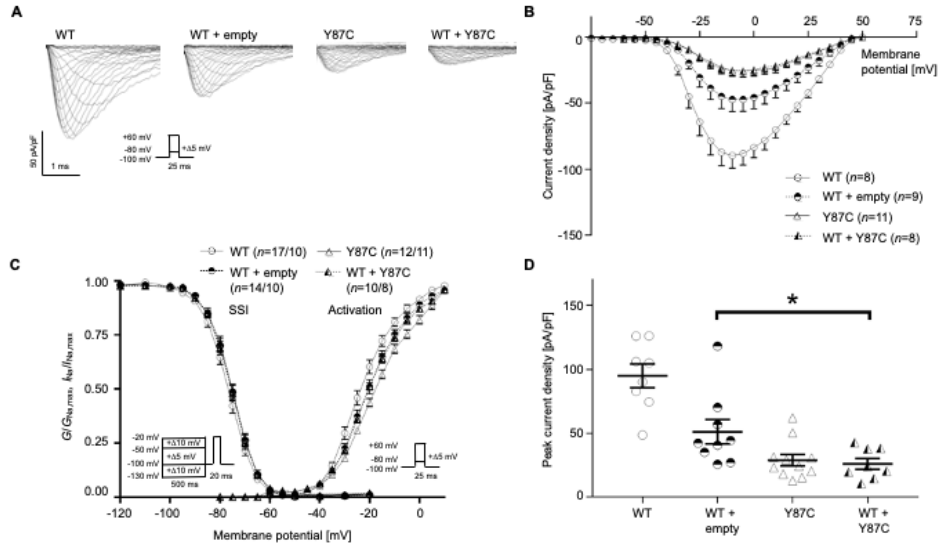

249

250  
251  
252  
253  
254  
255  
256  
257

**Figure 1 The newly identified BrS-associated  $Na_v1.5$  variant Y87C exerts dominant-negative effect over WT channels.** (A) Representative whole-cell  $I_{Na}$  traces recorded from TsA-201 cells transiently transfected with 100% WT  $Na_v1.5$ , 50% WT + 50% empty vector, 100% Y87C, or 50% WT + 50% Y87C. (B) Current density-voltage relationships of the four listed conditions. (C) Steady-state inactivation (SSI, left) and activation (right) relationships obtained using the Boltzmann equation. Whole-cell patch clamp protocols are given under the respective curves. (D) Peak current densities of each group under unsaturated conditions. Peak current density of WT + Y87C is significantly lower than that of WT + empty vector, indicating that Y87C exerts a dominant-negative effect over WT channels. Values pertaining to the biophysical properties are shown in Table 1. Data are presented as mean  $\pm$  SEM. \*,  $p < 0.05$ .

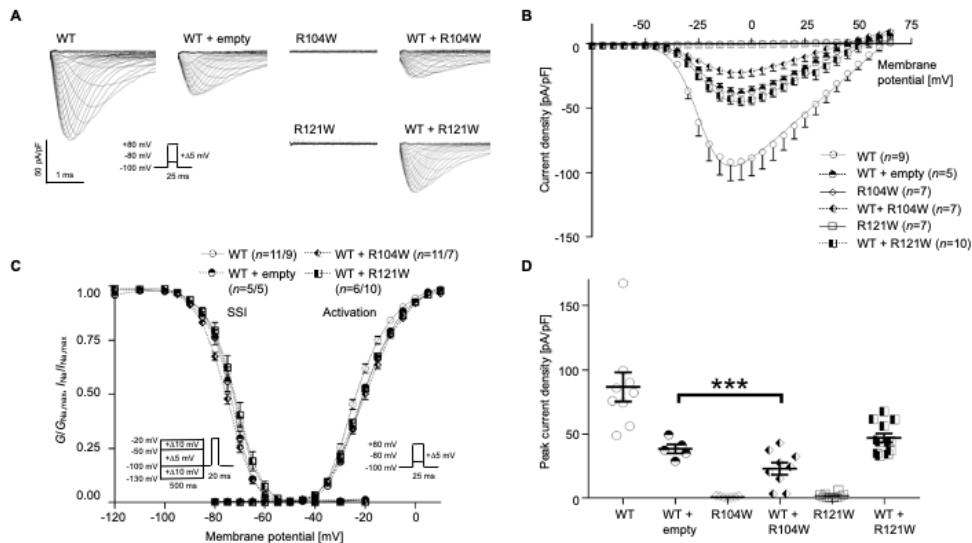

258

259  
260  
261  
262  
263  
264  
265  
266

**Figure 2  $Na_v1.5$  variant R104W but not R121W exerts dominant-negative effect over WT channels.** (A) Representative whole-cell  $I_{Na}$  traces recorded from TsA-201 cells transiently transfected with 100% WT  $Na_v1.5$ , 50% WT + 50% empty vector, 100% R104W, 50% WT + 50% R104W, 100% R121W or 50% WT + 50% R121W. (B) Current density-voltage relationships of the listed conditions. (C) Steady-state inactivation (SSI, left) and activation (right) curves obtained using the Boltzmann equation. Patch clamp protocols are given under the respective curves. (D) Peak current densities of each group under unsaturated condition. Peak current density of WT + R104W is significantly lower than that of WT + empty vector, indicating the dominant-negative effect of R104W over WT channels. Values pertaining to the biophysical properties are shown in Table 2. Data are presented as mean  $\pm$  SEM. \*\*\*,  $p < 0.001$ .

267

268 **Na<sub>v</sub>1.5 Y87C AND R104W NEGATIVELY REGULATE WT CHANNEL FUNCTION, BUT R121W DOES NOT**

269 To investigate the consequences of the Y87C variant on Na<sub>v</sub>1.5 function, we used the patch-clamp technique  
270 to record the sodium current  $I_{Na}$  of these channels. We transiently transfected TsA-201 cells with the Na<sub>v</sub>  
271  $\beta_1$ -subunit and either 100% Na<sub>v</sub>1.5 WT or Y87C, or with 50% WT and either 50% empty vector or 50%  
272 Y87C to mimic the heterozygous state of the patients (**Figure 1**). In the homozygous state, the Y87C peak-  
273 current density was  $65.9 \pm 9.5\%$  smaller than WT (**Figure 1A,B,D**), while the half-maximal activation  
274 potential ( $V_{1/2}$ ) of the Y87C activation curve shifted  $5.9 \pm 1.3\%$  in the depolarized direction while  
275 inactivation did not shift compared with WT (**Figure 1C, Table 1**). In the heterozygous state, co-expressing  
276 WT with Y87C led to a significant  $I_{Na}$  peak-current decrease of  $25.1 \pm 11.0\%$  when compared with WT +  
277 empty vector (**Figure 1D**). Taken together, these data show that cells expressing only Y87C channels  
278 conduct less whole-cell sodium current than those expressing WT channel, which the shift in activation  
279 curve only partly explains. Moreover, Y87C channels exert a DNE over WT channels, as WT + Y87C  
280 conduct  $\sim 50\%$  less  $I_{Na}$  than WT + empty vector (**Figure 1D**).

281 We compared the Y87C variant with the R104 and R121 variants, which were reported to also exert a DNE  
282 on WT channel function<sup>10</sup>. Both variants showed no  $I_{Na}$  in the homozygous state (**Figure 2A-B**), unlike  
283 Y87C (**Figure 1A-B**). In the heterozygous state, co-expressing WT + R104W decreased  $I_{Na}$  peak-current  
284 density by  $\sim 55\%$  compared to WT + empty vector, but no significant difference was observed between  $I_{Na}$   
285 from WT + R121W and WT + empty vector (**Figure 2D**). The  $V_{1/2}$  of the activation curves of the different  
286 heterozygous conditions did not differ (**Figure 2D, Table 2**).

287 In summary, Na<sub>v</sub>1.5 Y87C and R104W but not R121W negatively regulate WT channel function.

288 **VARIANT EXPRESSION AND GLYCOSYLATION ARE REDUCED COMPARED TO WT, BUT CHANNEL-ER**  
289 **COLOCALIZATION DOES NOT CHANGE IN VARIANT CONDITIONS**

290 To investigate the mechanisms underlying the reduced or undetectable  $I_{Na}$  conducted by Y87C, R104W,  
291 and R121W compared to WT Na<sub>v</sub>1.5 channels, we investigated protein expression at the cell surface and in  
292 whole-cell lysates from TsA-201 cells expressing the aforementioned WT or variant channels. We observed  
293 a reduction in Na<sub>v</sub>1.5 variant protein expression compared to WT, both overall and at the cell surface as  
294 shown by biotinylation experiments on transfected TsA-201 cells (**Figure 3**). Interestingly, only the high-  
295 molecular weight band intensities are reduced both overall and at the surface (**Figure 3B,E**), suggesting that  
296 the variant channels are not glycosylated as well as WT channels<sup>28,29</sup>. mRNA expression of variants and WT  
297 did not differ in transfected TsA-201 cells (**Supplementary figure 2**).

298 To assess the intracellular localization of these variants, we transfected rat neonatal cardiomyocytes (RNC)  
299 with calreticulin-DsRed ER marker and WT or variant Na<sub>v</sub>1.5 channels and imaged the cells on a confocal  
300 microscope with Airyscan (**Figure 4A**). In the homozygous condition, we did not observe any differences

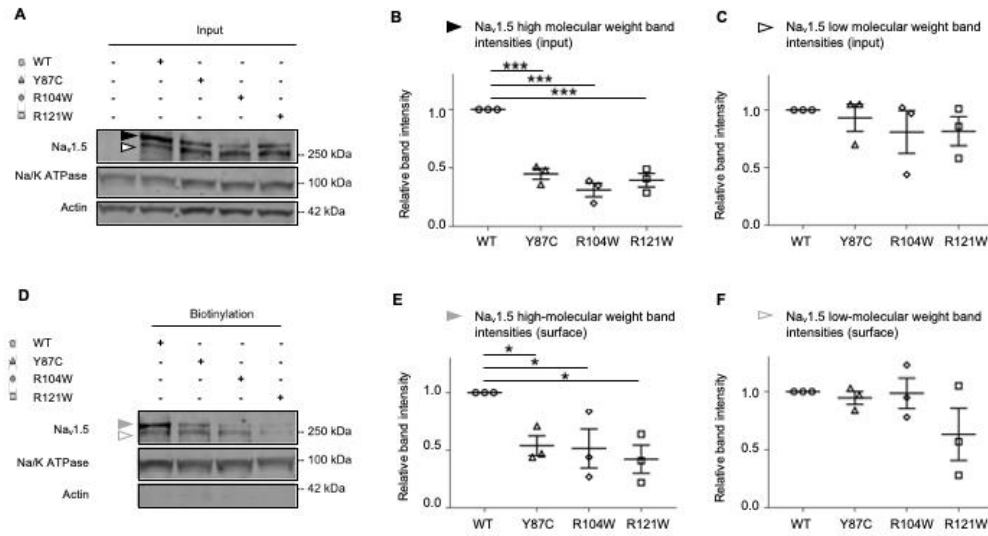

301 **Figure 3 Surface protein expression of all three BrS variants is decreased compared to WT in transfected TsA-201 cells. (A)**  
 302 Representative western blot of three independent experiments with whole-cell lysates of TsA-201 cells transiently transfected  
 303 with WT, Y87C, R104W, or R121W  $Na_v1.5$  ( $n = 3$ ). Solid and open black arrowheads represent the high- and low-molecular  
 304 weight bands, respectively. Full blots are shown in Supplementary Figure 4. **(B-C)** Relative protein band intensity of input high-  
 305 and low-molecular weight bands normalized to Na/K ATPase.  $Na_v1.5$  WT band intensities are normalized to 1 in each condition.  
 306 **(D)** Representative western blot of the surface biotinylated fraction of transfected TsA-201 cells (respective whole-cell lysates  
 307 are shown in **(A)**). Solid and open grey arrowheads represent the high- and low-molecular-weight, respectively. **(E-F)** Relative  
 308 intensity of surface high- and low-molecular-weight bands normalized to Na/K ATPase.  $Na_v1.5$  WT band intensities are  
 309 normalized to 1. Data are presented as mean  $\pm$  SEM. \*,  $p < 0.05$ ; \*\*\*,  $p < 0.001$ .

310 in colocalization of WT or variant channels with ER (**Figure 4C**). To mimic the heterozygous condition,  
 311 we transfected RNC with GFP-WT and FLAG-tagged variant channels, in addition to calreticulin-DsRed  
 312 (**Figure 4B**). Again, we did not observe any difference in colocalization of WT channels with the ER marker  
 313 in the presence of WT or variant channels (**Figure 4D**).

314 Taken together, the reduced peak  $I_{Na}$  density of Y87C, R104W, and R121W compared to WT channels  
 315 (**Figure 1D, 2D**) correlates with a reduction in surface and overall expression of fully glycosylated variant  
 316 channels.

### 317 **$Na_v1.5$ WT NTD ARE WITHIN INTERACTING DISTANCE TO THE $Na_v1.5$ WT FULL-LENGTH CHANNEL**

318 To explain how some NTD variants can confer a DNE while others cannot, it is essential to know that the  
 319 dominant-negative effect is thought to depend on channel dimerization<sup>30</sup>. Based on the observation that co-  
 320 expressing the NTD with full-length WT  $Na_v1.5$  increases sodium current<sup>10</sup>, we investigated the possibility  
 321 that the  $Na_v1.5$  NTD interacts with full-length channels. We performed proximity ligation assays on COS  
 322 cells transfected with full-length WT channels and WT NTDs to assess if the  $Na_v1.5$  NTD is within  
 323 interacting distance with the whole-length channel *in situ* (**Figure 5A**). **Figure 5B** shows that the WT NTDs  
 324 are close to full-length WT channels. These results suggest that indeed the  $Na_v1.5$  WT NTD can interact  
 325 with full-length WT  $Na_v1.5$ .

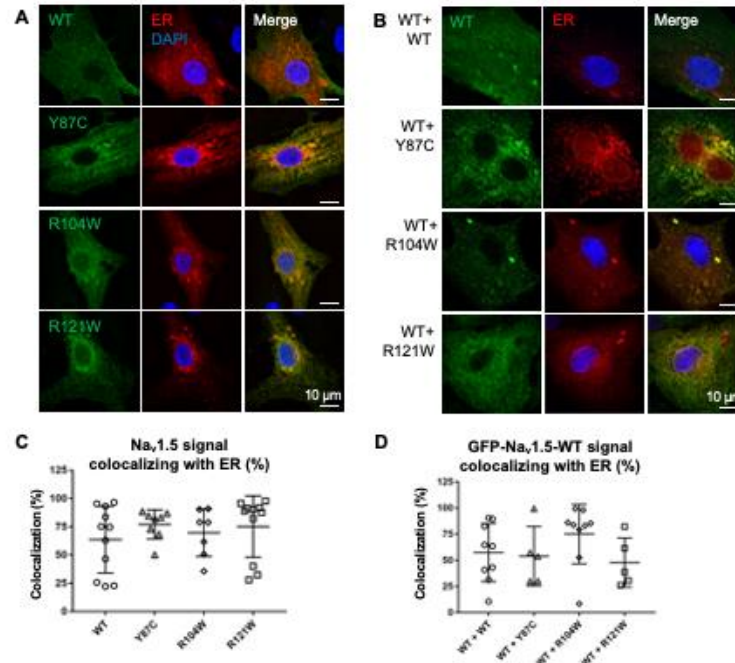

326

327 **Figure 4 WT and variant channel-ER colocalization is similar in homo- and heterozygous conditions. (A)** Airyscan microscopy  
 328 images of RNCs transiently co-transfected with WT or variant flag-Na<sub>v</sub>1.5 (green) and the ER marker calreticulin-DsRed2 (red),  
 329 representing homologous conditions. Nuclei are stained with DAPI (blue). Right column: merged images. Note that more Na<sub>v</sub>1.5  
 330 variant signals colocalize with ER than WT. **(B)** Airyscan microscopy images of RNCs transiently co-transfected with GFP-Na<sub>v</sub>1.5  
 331 WT (green), flag-Na<sub>v</sub>1.5 WT or variants (not shown), and calreticulin-DsRed2 (red). Right column: merged images; nuclei are  
 332 stained with DAPI (blue). **(C)** Quantification of Na<sub>v</sub>1.5-ER colocalization in homozygous conditions. Colocalization is defined as  
 333 percentage of Na<sub>v</sub>1.5 signal area colocalizing with ER signal area within predefined ROI. **(D)** Quantification of colocalization of  
 334 WT-Na<sub>v</sub>1.5 with ER in the presence of variants, representing heterozygous conditions. Cell areas in which Na<sub>v</sub>1.5 and ER  
 335 colocalize are: WT, 57.4 ± 9.3%; Y87C, 54.0 ± 12.6%; R104W, 75.1 ± 9.5%; and R121W, 47.9 ± 10.5%. Scale bar, 10  $\mu$ m. Data are  
 336 presented as mean ± SEM.

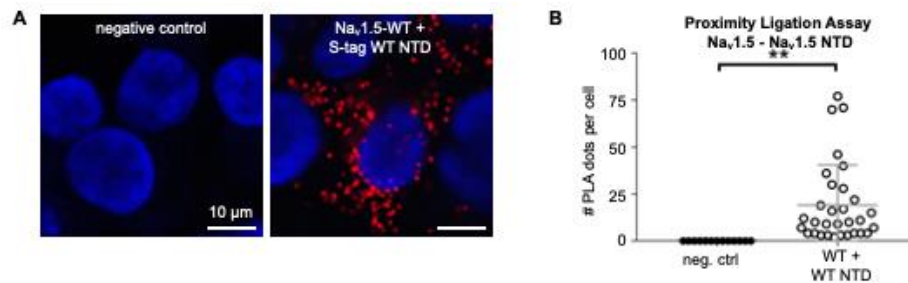

337

338 **Figure 5 CaM interacts with Na<sub>v</sub>1.5 NTD. (A)** Representative Duolink<sup>®</sup> PLA images of COS cells transiently transfected with WT S-  
 339 tagged Na<sub>v</sub>1.5 NTD. Red dot signals were generated when full-length WT Na<sub>v</sub>1.5 is within 40 nm of WT or variant NTD. Nuclei  
 340 stained with DAPI in blue. Scale bar, 10  $\mu$ m. **(B)** Quantitative analysis of the PLA signals. Data are presented as mean ± SEM. \*\*, p  
 341 < 0.005.

### 342 CAM BINDS TO NA<sub>v</sub>1.5 NTD

343 To explain why the R121W does not exert a DNE while Y87C and R104W do, we hypothesized that the N-  
 344 terminal domain around position R121 must contain a binding site for a yet-unknown protein. We  
 345 hypothesized that CaM might be able to bind the Nav1.5 N-terminus based on the following observations.

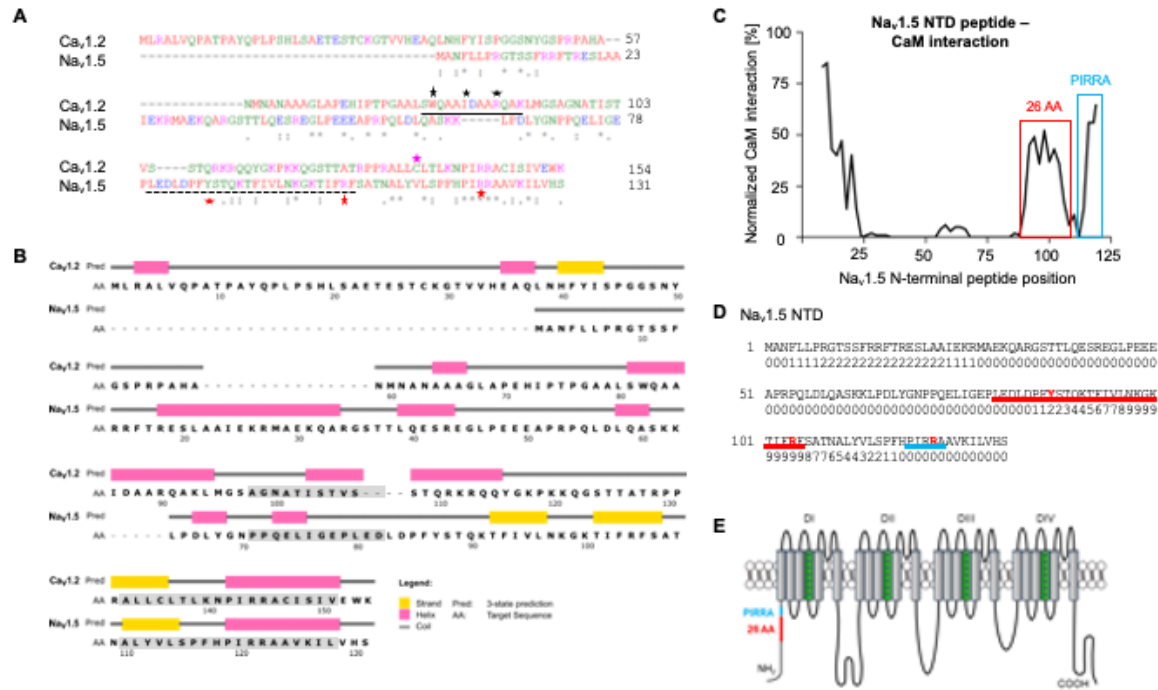

346

347 **Figure 6 CaM is predicted to bind Nav<sub>v</sub>1.5 NTD.** (A) Sequence alignment of Nav<sub>v</sub>1.5 and Cav<sub>v</sub>1.2 NTDs used in this study  
 348 (<https://www.ebi.ac.uk/Tools/msa/clustalo/>). The Nav<sub>v</sub>1.5 BrS variants studied here are marked with red stars. The 26-AA-long  
 349 predicted CaM Nav<sub>v</sub>1.5 NTD binding site is marked with a dashed black line. Solid black line<sup>17,31</sup>, black stars<sup>32</sup>, and cyan star<sup>16</sup>  
 350 indicate CaM binding sites in the Cav<sub>v</sub>1.2 NTD. Residue homologies are scored as follows: asterisk (\*), identical; colon (:), strongly  
 351 similar properties; stop (.), weakly similar properties. Residue color codes: red: small; blue: acidic; magenta: basic; green:  
 352 hydroxyl, sulfhydryl, amine. (B) Secondary structure prediction of Nav<sub>v</sub>1.5 and Cav<sub>v</sub>1.2 NTDs (<http://bioinf.cs.ucl.ac.uk/psipred/>).  
 353  $\beta$ -strands (yellow),  $\alpha$ -helices (cyan), and coil regions (grey) are indicated. Grey boxes indicate sequences with a high degree  
 354 of homology (<https://blast.ncbi.nlm.nih.gov>). (C) Normalized interaction between Nav<sub>v</sub>1.5 NTD peptides and CaM based on peptide  
 355 SPOTS arrays. The signal amplitude of the first peptide (AA 1-15) is centered at AA position 8 and the last (AA 112-126) at 121.  
 356 The interaction was normalized to the strongest signal correspondent to the IQ motif in Nav<sub>v</sub>1.5 C-terminal domain. Predicted  
 357 CaM binding site is marked in red; peptides containing the PIRRA motif in blue. (D) Sequence of Nav<sub>v</sub>1.5 NTD with predicted CaM  
 358 binding scores. Scores are normalized on a scale from 0 to 9. A sequence with consecutively high scores suggests the presence  
 359 of a CaM binding site. The 26 amino acid sequence containing the putative CaM binding site based on peptide SPOTS arrays (C)  
 360 is underlined in red. The PIRRA motif is underlined in blue. The amino acids corresponding to the Y87C, R104W, and R121W  
 361 variants are given in red. (E) Topology of the Nav<sub>v</sub>1.5  $\alpha$ -subunit. Red line indicates location of predicted CaM binding sequence,  
 362 blue line indicates PIRRA motif location. Panel (E) adapted from Abriel *et al.*<sup>6</sup>

363 Firstly, calmodulin binds the NTD of the voltage-gated calcium channel Cav<sub>v</sub>1.2 at two different sites<sup>16,17</sup>,  
 364 and plays a role in C-terminal dimerization of Cav<sub>v</sub>1.2<sup>33,34</sup> and Nav<sub>v</sub>1.5<sup>35</sup>. Secondly, the NTDs of Nav<sub>v</sub>1.5 and  
 365 Cav<sub>v</sub>1.2 both contain a highly conserved sequence consisting of the residues PIRRA (**Figure 6A,B**), herein  
 366 the PIRRA motif. In Cav<sub>v</sub>1.2, this motif interacts with calmodulin and calmodulin-binding protein 1  
 367 (CaBP1)<sup>16,36</sup>. Moreover, several sequence fragments of the Cav<sub>v</sub>1.2 and Nav<sub>v</sub>1.5 NTDs have a high level of  
 368 sequence identity<sup>37</sup> (**Figure 6B**).

369 Firstly, we used the CaM target database to predict the CaM-Nav<sub>v</sub>1.5 NTD binding affinity (Figure  
 370 6D).<sup>16,32,38</sup> Consecutive high binding scores suggest a CaM binding site, which occurs at amino acid  
 371 residues ~94-~108 (**Figure 6D**), which includes R104, but not Y87 and R121.

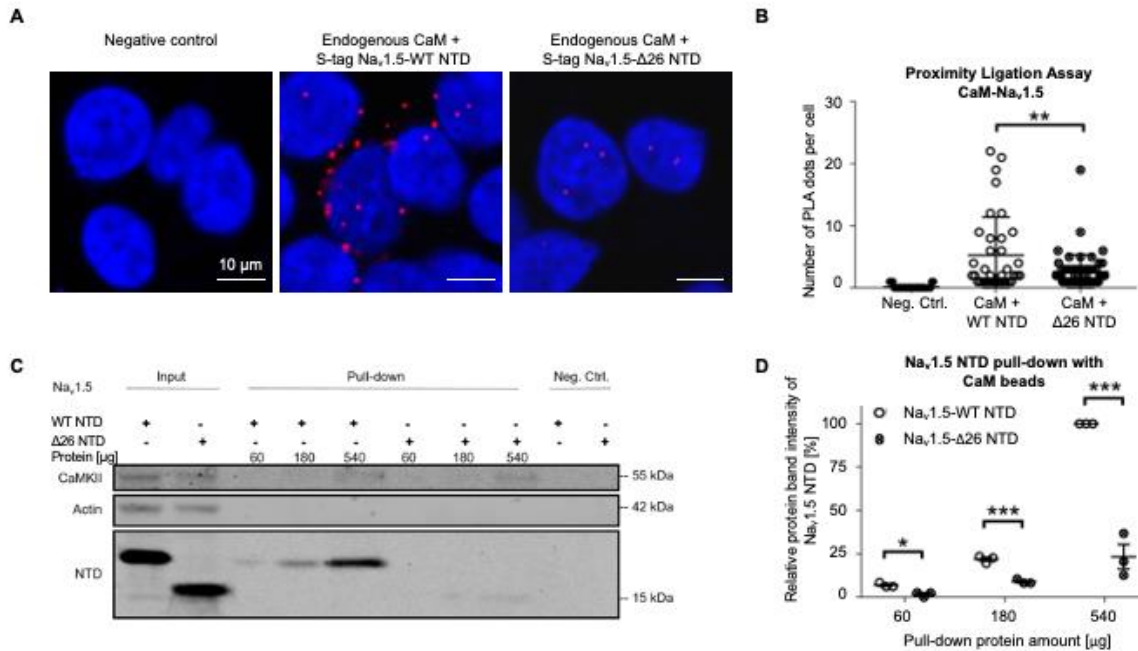

372

373 **Figure 7 CaM binds to Nav<sub>v</sub>1.5 N-terminal domain.** (A) Representative Duolink<sup>®</sup> PLA images of COS cells transiently transfected  
 374 with S-tagged WT NTD, Δ26 Nav<sub>v</sub>1.5 NTD, or empty vector as a negative control. Red dots were generated when endogenous CaM  
 375 and NTD were less than 40 nm apart. Nuclei are stained blue with DAPI. Scale bar, 10 μm. (B) Quantitative analysis of the PLA  
 376 signals. (C) Representative western blot of three independent CaM pull-down experiments performed with TsA-201 cells  
 377 transiently transfected with S-tagged WT or Δ26 Nav<sub>v</sub>1.5 NTD. In the latter, the 26 amino acids comprising the predicted CaM-  
 378 binding sequence (Figure 6) were deleted. We used different amounts of cell lysate (60, 180, 540 μg) to detect CaM-interaction  
 379 under non-saturating conditions. Full blots are shown in Supplementary Figure 5. (D) Relative protein band intensity of pulled-  
 380 down Nav<sub>v</sub>1.5 NTDs. The protein band intensities are normalized to the 540 μg Nav<sub>v</sub>1.5 WT NTD condition. Compared to WT, the  
 381 pulled-down Δ26 NTD relative protein band intensity reduced by ~5%, ~12%, or ~75% with 60, 180, or 540 μg protein lysate,  
 382 respectively. Data are presented as mean ± SEM. \*,  $p < 0.05$ ; \*\*,  $p < 0.005$ ; \*\*\*,  $p < 0.001$ .

383 We then processed the Nav<sub>v</sub>1.5 NTD with a peptide SPOTS array to biochemically assess CaM binding to  
 384 15-amino-acid-long N-terminal peptides (Figure 6C). We identified a putative CaM-binding sequence  
 385 comprising 26 amino acids (residues 80-105, Figure 6C), which overlapped with the computational  
 386 prediction (Figure 6D) and included Y87 and R104, but not R121.

387 To validate the putative CaM-binding sequence, we determined whether CaM is close to the Nav<sub>v</sub>1.5 NTD  
 388 *in situ* by performing proximity ligation assays (PLA) on COS cells transfected with S-tagged Nav<sub>v</sub>1.5 WT  
 389 NTD or Δ26 NTD, in which the 26-amino-acid-long putative CaM binding site was deleted (Figure 7A). A  
 390 dot in these images indicates that a Nav<sub>v</sub>1.5 NTD and CaM are within 40 nm of each other. We observed that  
 391 much more CaM proteins are in close proximity to Nav<sub>v</sub>1.5 WT NTD than to Δ26 NTD (Figure 7B).

392 Next, we performed CaM pull-down assays at the physiological Ca<sub>2+</sub> concentration of 100 nM to determine  
 393 if CaM binds to the Nav<sub>v</sub>1.5 WT NTD (Figure 7C). Lysates from TsA-201 cells transfected with Nav<sub>v</sub>1.5  
 394 NTD constructs were exposed to CaM-coated or uncoated control sepharose beads. Proteins bound to the  
 395 beads were eluted and visualized on western blots. The well-established CaM interaction partner CaMKII

396 served as positive control<sup>39</sup> (**Figure 7C**). We observed that the CaM-coated beads but not the control beads  
397 had pulled-down NTD proteins, suggesting that CaM specifically binds to the NTD.

398 Moreover, deleting the aforementioned 26 amino acids ( $\Delta 26$ ) from the NTD greatly reduced CaM binding  
399 in all tested conditions with cell lysate amounts containing 60  $\mu\text{g}$ , 180  $\mu\text{g}$ , and 540  $\mu\text{g}$  protein (**Figure 7D**),  
400 suggesting that these 26 amino acids comprise a CaM binding site. As less than 540  $\mu\text{g}$  protein did not  
401 saturate the western blots (**Figure 7C**), we chose to use 360  $\mu\text{g}$  protein for the following pull-down  
402 experiments.

403 Taken together, these results suggest that CaM interacts with the Nav1.5 WT NTD and that this interaction  
404 largely depends on 26 residues of the NTD.

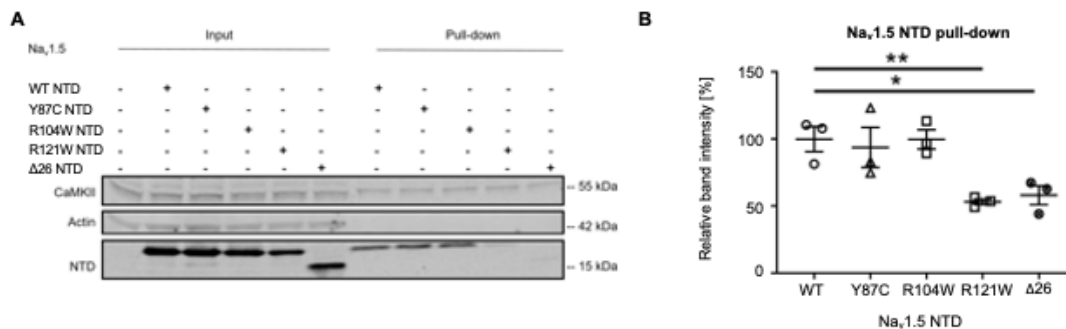

405

406 **Figure 8 Na<sub>v</sub>1.5 variant R121W weakens the interaction of Na<sub>v</sub>1.5 NTD with CaM.** (A) Representative western blot of three  
407 independent CaM-Na<sub>v</sub>1.5 NTD pull-down experiments using cell lysate equivalent to 360  $\mu\text{g}$  protein per condition from TsA-201  
408 cells transfected with WT, Y87C, R104W, R121W or  $\Delta 26$  Na<sub>v</sub>1.5 NTD. Full blots including negative controls are shown in  
409 Supplementary Figure 6. (B) Na<sub>v</sub>1.5 NTD protein band intensities of are normalized to the average WT value. Data are presented  
410 as mean  $\pm$  SEM. \*\*\*,  $p < 0.001$ .

#### 411 **R121W BUT NOT Y87C AND R104W WEAKEN THE NA<sub>v</sub>1.5 NTD-CAM INTERACTION**

412 We next investigated CaM binding to the WT, Y87C, R104W, R121W, and  $\Delta 26$  Na<sub>v</sub>1.5 NTDs using CaM  
413 pull-downs. We observed that the binding of WT, Y87C, and R104W NTDs to the CaM beads was similar,  
414 while R121W and  $\Delta 26$  NTDs did so to a much lesser extent ( $\sim 50\%$ ) (**Figure 8A, B**). These results suggest  
415 that  $\Delta 26$  and R121W impair the Nav1.5 NTD-CaM interaction, but Y87C and R104W do not. Please note  
416 that R121W is outside of the predicted 26 amino acid CaM-binding region (**Figure 3C**), suggesting CaM  
417 may bind two NTD sites.

418 Based on the notion that the homologous Ca<sub>v</sub>1.2 NTD contains a similar arginine to Nav1.5-R121, both  
419 residing in the PIRRA motif<sup>16,36</sup>, we next determined if mutating the Ca<sub>v</sub>1.2 homologous site R144W also  
420 weakens the Ca<sub>v</sub>1.2-CaM interaction. We performed CaM pull-down assays with lysates from TsA-201  
421 cells transfected with Ca<sub>v</sub>1.2-R144W-NTD or Ca<sub>v</sub>1.2-WT-NTD (**Supplementary figure 3A, B**). We found  
422 that CaM binds to Ca<sub>v</sub>1.2 WT NTD, consistent with previous reports<sup>16,17</sup>, while R144W partly abolished the



423 interaction with CaM by  $66.0 \pm 7.7\%$  (**Supplementary figure 3A, B**), which is expected as R144 lies within  
424 one of the two N-terminal sequences previously associated with CaM binding<sup>16</sup>.

425 In summary, in the Nav1.5 NTD, both the predicted 26 amino acid sequence and R121 are involved in CaM  
426 binding. Similarly, the Cav1.2 NTD R144 site is homologous to R121 and required for CaM binding.

## 427 DISCUSSION

428 In this work, we demonstrated that CaM binds the N-terminus of Nav1.5, which resembles CaM binding to  
429 the NTD of Cav1.2<sup>16,17,33,34</sup>. This interaction seems to be crucial for the dominant-negative effect, in which  
430 a Nav1.5 NTD variant identified in BrS patients negatively regulates wild-type channel function.  
431 Specifically, we identified in probands of a Russian family the new natural Brugada syndrome variant Y87C  
432 in the Nav1.5 NTD and showed that Y87C-Nav1.5 channels exert a DNE on WT channels when co-expressed  
433 in TsA-201 cells.

434 We also showed that natural BrS variants in the Nav1.5 NTD do not consistently show a DNE: Y87C and  
435 R104W do, while R121W does not. To explain this discrepancy, we showed that CaM binding to Nav1.5  
436 NTD partly depends on amino acids 80-105 (a 26-AA-long sequence) or residue R121. Thus, the DNE of  
437 the tested NTD BrS variant correlates with CaM-NTD interaction strength. Moreover, all tested BrS variant  
438 full-length channels show reduced expression and glycosylation at the cell surface than wild-type channels.  
439 We schematically summarize the functional consequences of the BrS variants in **Figure 9**.

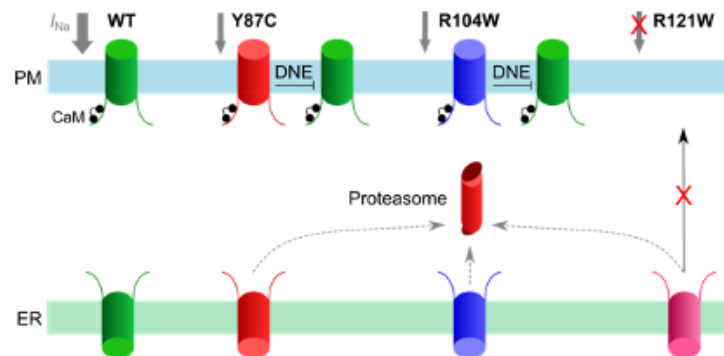

440

441 **Figure 9 Working model of the CaM-Nav1.5 NTD interactions and Nav1.5 variants in homozygous conditions.** Nav1.5 WT  
442 channels (green) are readily trafficked from the ER to the plasma membrane and conduct a normal  $I_{Na}$  density (grey). Y87C (red)  
443 or R104W (blue) channel proteasomal degradation (red) is increased and  $I_{Na}$  is decreased compared to WT, while exerting a DNE  
444 on variant channels. R121W channels (pink) do not conduct a detectable sodium current and do not exert a DNE on wild-type  
445 channels. CaM (black) interacts with WT, Y87C, and R104W channels but not with R121W.

## 446 CAM BINDS TO THE NAV1.5 N-TERMINAL DOMAIN

447 We established the CaM-Nav1.5 NTD interaction based on *in silico* modeling, SPOTS assay, pull-down  
448 assays and *in situ* hybridization assays using heterologous expression systems transiently expressing Nav1.5  
449 NTD constructs. This interaction partly depends on R121 and amino acids 80-105. We moreover showed

450 that full-length Nav1.5-Nav1.5 NTD interaction is reduced when amino acids 80-105 are deleted or R121 is  
451 mutated (**Figure 8**). Whether CaM interacts with the Nav1.5 NTD *in vivo*, and whether this interaction is  
452 involved in Nav1.5 dimerization, remain open questions. We show in COS cells that the Nav1.5 NTD is  
453 within interacting distance (<40 nm) of full-length Nav1.5 (**Figure 5**); thus, we may hypothesize that Nav1.5  
454 channels interact *in vivo* in a CaM-mediated manner. We showed that the natural BrS variant R121W in the  
455 Nav1.5 homologous PIRRA motif diminishes interaction of NTD with full-length Nav1.5. The same was  
456 observed when deleting amino acids 80-105, which suggests that CaM may have two binding sites,  
457 potentially one for each lobe. At the Nav1.5 DII-III linker, distinct binding sites have already been described  
458 for the CaM C- and N-lobe<sup>40,41</sup>. Future research efforts should be directed towards specifying the intricacies  
459 of the CaM-Nav1.5 NTD binding. Besides potentially playing a role in channel dimerization, CaM binding  
460 to the Nav1.5 NTD may have other effects. At the Nav1.5 C-terminal IQ motif, for instance, CaM interaction  
461 reduces the late sodium current<sup>42</sup>, and affects voltage-dependence of activation in an calcium-dependent  
462 manner<sup>35,43,44</sup>. Given the multiple CaM binding sites at a full-length Nav1.5 channel, the stoichiometry of  
463 Nav1.5:CaM remains to be determined. Previous FRET experiments have shown a 1:1 stoichiometry<sup>41</sup>;  
464 however, the Nav1.5 N-terminus was not included in the respective Nav1.5 peptides.

465 Besides CaM, other Nav1.5 NTD binding partners may play a role in Nav1.5 dimerization and the DNE.  $\alpha$ 1-  
466 syntrophin has been shown to bind the three C-terminal residues of Nav1.5 and serine-20 of the Nav1.5  
467 NTD<sup>45,46</sup>, where it plays a role in the chaperone effect of the NTD, in which co-expressing the Nav1.5 NTD  
468 with full-length Nav1.5 (or with Kir2.1 and -2) leads to higher  $I_{Na}$  (or  $I_{K1}$ ) compared to full-length channel  
469 expression alone in CHO cells<sup>45</sup>. Together with the notion that  $\alpha$ 1-syntrophin is a critical mediator for Nav1.5  
470 anchoring to the cytoskeleton<sup>47-49</sup>, these findings suggest that  $\alpha$ 1-syntrophin may too mediate channel-  
471 channel interactions and/or clustering. However, the  $\alpha$ 1-syntrophin-binding residue serine-20 is not affected  
472 by any of the NTD constructs used in this study.

### 473 **THE DOMINANT-NEGATIVE EFFECT OF NAV1.5 VARIANTS**

474 Contrary to a previous report<sup>10</sup>, we show that R121W full-length channels do not exert a DNE on wild-type  
475 channels, while R104W and the newly identified variant Y87C do (**Figure 1, 2**). We also could not  
476 reproduce the positive shift in activation of the sodium current when R104W and R121W channels are co-  
477 expressed with WT channels as Clatot *et al.* observed<sup>10</sup>. These discrepancies may lie in experimental  
478 conditions (TsA-201 cells and untagged *SCN5A* constructs in our study versus HEK293 cells and GFP-  
479 tagged *SCN5A* constructs used by Clatot *et al.*<sup>10</sup>). Experiments in hiPSCs from variant-carrying BrS patients  
480 or in mouse models heterozygous for R104W, R121W, or Y87C could shed light on this discrepancy in a  
481 more native or *in vivo* system.

482 Although our data do not give direct evidence for Nav1.5-Nav1.5 dimerization, we may hypothesize that the  
483 observed DNE of R104W and Y87C BrS variants depends on Nav1.5 NTD dimerization based on the

484 following observations. Firstly, partly abolishing the CaM interaction by mutating R121 correlated with the  
485 absence of the DNE (**Figure 2**). Secondly, CaM plays a role in Nav1.5 and Cav1.2 dimerization at their C-  
486 termini<sup>16,33-36</sup>. This may be extrapolated to the Nav1.5 NTD but remains to be investigated. Thirdly, Nav1.5  
487 dimerization mediated by 14-3-3 at the DI-II linker has been shown to be crucial for Nav1.5 DNE as  
488 inhibiting 14-3-3 binding abolished the DNE<sup>12</sup>. In addition to 14-3-3, Mercier *et al.* reported that the sodium  
489 channel  $\beta_1$ -subunit was required for the DNE<sup>28</sup>. Indeed, the DNE of Nav1.5 loss-of-function variants may  
490 involve many more molecular determinants. Partly underlying this gap in knowledge is the notion that  
491 research groups functionally characterizing Nav1.5 variants rarely co-express WT with variant channels;  
492 therefore, literature on the Nav1.5 DNE is relatively scarce. How CaM, 14-3-3, the  $\beta_1$ -subunit, and potential  
493 other Nav1.5 interacting proteins interdependently or independently establish the DNE, and which known  
494 Nav1.5 variants do and do not exert a DNE, are exciting venues for future research.

495 The hypothesis that channel di- or multimerization underlies the DNE of variant Nav1.5 is further indirectly  
496 supported by the multimerization of other voltage-gated channels. Cav1.2 channels in the heart for instance  
497 have been shown to be functionally and physically coupled in a CaM- and Ca<sup>2+</sup>-mediated manner<sup>50</sup>. This  
498 coupling is increased by  $\beta$ -adrenergic stimulations<sup>51</sup>. In the brain, functional coupling has been shown for  
499 BK and Cav1.3 channels, and cooperative gating has been suggested to play a role in short-term memory<sup>52,53</sup>.  
500 Lastly, voltage-gated proton channels that are expressed in many organisms and tissues are also shown to  
501 gate cooperatively<sup>54-56</sup>. The body of knowledge regarding channel-channel interactions however is still in  
502 its infancy, and the roles of these interactions in the pathogenesis of cardiac arrhythmias remain to be  
503 uncovered.

#### 504 **DECREASED NAV1.5 PROTEIN EXPRESSION AND ITS SUBCELLULAR LOCALIZATION**

505 We observed a reduction in protein expression of the fully glycosylated form of Y87C, R104W, or R121W  
506 channels compared to wild-type, both at the surface and in whole-cell lysates, whereas expression of the  
507 core-glycosylated form did not change (**Figure 3**). Functionally, a reduction in fully glycosylated Nav1.5  
508 channels has been shown to change voltage-dependency of Nav1.5<sup>57</sup>; however, we have not observed this  
509 effect in our own functional experiments (**Figure 1,2**). We investigated whether this could be explained by  
510 variants retaining wild-type channels in the ER, but in the presence of variant channels, wild-type channels  
511 showed similar degrees of co-localization with the ER (**Figure 4**). mRNA expression was the same between  
512 groups (**Supplementary figure 2**), indicating that variability in transfection rate, gene transcription, or  
513 mRNA processing do not underlie the differences in protein expression. Rather, we expect that the reduction  
514 in fully glycosylated variant Nav1.5 may be the result of increased proteasomal degradation. Mercier *et al.*  
515 have shown that the fully glycosylated band represents Nav1.5 channels that have followed the pathway  
516 from ER to Golgi and the plasma membrane, whereas core-glycosylated channels are transported from the  
517 ER straight to the plasma membrane<sup>28</sup>. Thus, we hypothesize that fully glycosylated BrS variant channels

518 having passed through the Golgi seem more susceptible to proteasome-mediated degradation. The  
519 underlying mechanisms however remain unclear and offer exciting venues for future study.

## 520 CONCLUSION

521 Based on our experimental data, we can conclude that the novel naturally occurring Y87C variant is likely  
522 directly linked to the BrS phenotype of the probands. Moreover, we show novel calmodulin binding sites at  
523 the Nav1.5 N-terminal domain, in conjunction with its putative role in the dominant-negative effect of  
524 natural Brugada syndrome variants. These results need to be validated *in vivo* and the intricacies of CaM-  
525 Nav1.5 NTD binding remain to be unraveled.

## 526 FUNDING DETAILS

527 This research project was supported by the Swiss National Science Foundation Grant, project n°  
528 310030\_165741 to H.A.

## 529 ACKNOWLEDGMENTS

530 The authors sincerely thank Regula Flückiger-Labrada for her excellent work in isolating rat neonatal  
531 cardiomyocytes, Anne-Flore Hämmerli for technical assistance, Dr. Nathalie Neyroud and Dr. Jin Li for  
532 fruitful discussions, and Dr. Kali Tal for her editing of a previous version of the manuscript. The authors  
533 also acknowledge the contribution of the Microscopy Imaging Center (MIC), University of Bern.

## 534 AUTHOR CONTRIBUTIONS

535 Z.W. and H.A. designed this research project. Z.W., A.H., V.S., A.S., and D.R.K performed the  
536 experiments. E.V.Z. provided the ECG and clinical description. Z.W., S.V., A.H., and D.R.K. analyzed the  
537 data. Z.W. and S.V. made figures and tables. Z.W. and S.V. drafted and edited the manuscript. Z.W., S.V.,  
538 D.R.K., G.P., and H.A. critically reviewed the manuscript.

## 539 DISCLOSURE OF INTEREST

540 The authors declare no conflict of interest.

## 541 REFERENCES

- 542 1 Vutthikraivit, W. *et al.* Worldwide Prevalence of Brugada Syndrome: A Systematic Review and Meta-  
543 Analysis. *Acta Cardiol Sin* **34**, 267-277, doi:10.6515/ACS.201805\_34(3).20180302B (2018).
- 544 2 Mizusawa, Y. & Wilde, A. A. Brugada syndrome. *Circ Arrhythm Electrophysiol* **5**, 606-616,  
545 doi:10.1161/CIRCEP.111.964577 (2012).
- 546 3 Brugada, J., Campuzano, O., Arbelo, E., Sarquella-Brugada, G. & Brugada, R. Present Status of Brugada  
547 Syndrome: JACC State-of-the-Art Review. *J Am Coll Cardiol* **72**, 1046-1059, doi:10.1016/j.jacc.2018.06.037  
548 (2018).
- 549 4 Priori, S. G. *et al.* 2015 ESC Guidelines for the management of patients with ventricular arrhythmias and the  
550 prevention of sudden cardiac death: The Task Force for the Management of Patients with Ventricular

- 551 Arrhythmias and the Prevention of Sudden Cardiac Death of the European Society of Cardiology (ESC).  
552 Endorsed by: Association for European Paediatric and Congenital Cardiology (AEPC). *Eur Heart J* **36**, 2793-  
553 2867, doi:10.1093/eurheartj/ehv316 (2015).
- 554 5 Hedley, P. L. *et al.* The genetic basis of Brugada syndrome: a mutation update. *Hum Mutat* **30**, 1256-1266,  
555 doi:10.1002/humu.21066 (2009).
- 556 6 Abriel, H. Roles and regulation of the cardiac sodium channel Na v 1.5: recent insights from experimental  
557 studies. *Cardiovasc Res* **76**, 381-389, doi:10.1016/j.cardiores.2007.07.019 (2007).
- 558 7 Kapplinger, J. D. *et al.* An international compendium of mutations in the SCN5A-encoded cardiac sodium  
559 channel in patients referred for Brugada syndrome genetic testing. *Heart Rhythm* **7**, 33-46,  
560 doi:10.1016/j.hrthm.2009.09.069 (2010).
- 561 8 Sottas, V. & Abriel, H. Negative-dominance phenomenon with genetic variants of the cardiac sodium channel  
562 Na1.5. *Biochim Biophys Acta*, doi:10.1016/j.bbamcr.2016.02.013 (2016).
- 563 9 Keller, D. I. *et al.* Brugada syndrome and fever: genetic and molecular characterization of patients carrying  
564 SCN5A mutations. *Cardiovasc Res* **67**, 510-519, doi:10.1016/j.cardiores.2005.03.024 (2005).
- 565 10 Clatot, J. *et al.* Dominant-negative effect of SCN5A N-terminal mutations through the interaction of Na(v)1.5  
566 alpha-subunits. *Cardiovasc Res* **96**, 53-63, doi:10.1093/cvr/cvs211 (2012).
- 567 11 Hoshi, M. *et al.* Brugada syndrome disease phenotype explained in apparently benign sodium channel  
568 mutations. *Circ Cardiovasc Genet* **7**, 123-131, doi:10.1161/CIRCGENETICS.113.000292 (2014).
- 569 12 Clatot, J. *et al.* Voltage-gated sodium channels assemble and gate as dimers. *Nat Commun* **8**, 2077,  
570 doi:10.1038/s41467-017-02262-0 (2017).
- 571 13 Ben-Johny, M. *et al.* Towards a Unified Theory of Calmodulin Regulation (Calmodulation) of Voltage-Gated  
572 Calcium and Sodium Channels. *Current molecular pharmacology* **8**, 188-205 (2015).
- 573 14 Niu, J. *et al.* Allosteric regulators selectively prevent Ca(2+)-feedback of CaV and NaV channels. *eLife* **7**,  
574 doi:10.7554/eLife.35222 (2018).
- 575 15 Johnson, C. N. Calcium modulation of cardiac sodium channels. *J Physiol*, doi:10.1113/jp277553 (2019).
- 576 16 Simms, B. A., Souza, I. A. & Zamponi, G. W. A novel calmodulin site in the Cav1.2 N-terminus regulates  
577 calcium-dependent inactivation. *Pflugers Arch* **466**, 1793-1803, doi:10.1007/s00424-013-1423-9 (2014).
- 578 17 Dick, I. E. *et al.* A modular switch for spatial Ca<sup>2+</sup> selectivity in the calmodulin regulation of CaV channels.  
579 *Nature* **451**, 830-834, doi:10.1038/nature06529 (2008).
- 580 18 Richards, S. *et al.* Standards and guidelines for the interpretation of sequence variants: a joint consensus  
581 recommendation of the American College of Medical Genetics and Genomics and the Association for  
582 Molecular Pathology. *Genet Med* **17**, 405-424, doi:10.1038/gim.2015.30 (2015).
- 583 19 Rohr, S., Flückiger-Labrada, R. & Kucera, J. P. J. P. A. Photolithographically defined deposition of  
584 attachment factors as a versatile method for patterning the growth of different cell types in culture. **446**, 125-  
585 132 (2003).
- 586 20 Frank, R. The SPOT-synthesis technique. Synthetic peptide arrays on membrane supports--principles and  
587 applications. *J Immunol Methods* **267**, 13-26, doi:10.1016/s0022-1759(02)00137-0 (2002).
- 588 21 Ashpole, N. M. & Hudmon, A. Excitotoxic neuroprotection and vulnerability with CaMKII inhibition. *Mol*  
589 *Cell Neurosci* **46**, 720-730, doi:10.1016/j.mcn.2011.02.003 (2011).
- 590 22 Johnson, D. & Hudmon, A. Activation State-Dependent Substrate Gating in Ca<sup>2+</sup>. *J Neural Plasticity* **2017**  
591 (2017).
- 592 23 Singla, S. I., Hudmon, A., Goldberg, J. M., Smith, J. L. & Schulman, H. Molecular characterization of  
593 calmodulin trapping by calcium/calmodulin-dependent protein kinase II. *J Biol Chem* **276**, 29353-29360,  
594 doi:10.1074/jbc.M101744200 (2001).
- 595 24 Bradford, M. M. A rapid and sensitive method for the quantitation of microgram quantities of protein utilizing  
596 the principle of protein-dye binding. *Anal Biochem* **72**, 248-254, doi:10.1006/abio.1976.9999 (1976).
- 597 25 Maravall, M., Mainen, Z., Sabatini, B. & Svoboda, K. Estimating intracellular calcium concentrations and  
598 buffering without wavelength ratioing. *J Biophysical journal* **78**, 2655-2667 (2000).
- 599 26 Livak, K. J. & Schmittgen, T. D. Analysis of Relative Gene Expression Data Using Real-Time Quantitative  
600 PCR and the 2- $\Delta\Delta$ CT Method. *Methods* **25**, 402-408, doi:10.1006/meth.2001.1262 (2001).
- 601 27 Hichri, E., Abriel, H. & Kucera, J. P. Distribution of cardiac sodium channels in clusters potentiates ephaptic  
602 interactions in the intercalated disc. *J Physiol* **596**, 563-589, doi:10.1113/jp275351 (2018).
- 603 28 Mercier, A. *et al.* Nav1.5 channels can reach the plasma membrane through distinct N-glycosylation states.  
604 *Biochim Biophys Acta* **1850**, 1215-1223, doi:10.1016/j.bbagen.2015.02.009 (2015).
- 605 29 Stocker, P. J. & Bennett, E. S. Differential sialylation modulates voltage-gated Na<sup>+</sup> channel gating throughout  
606 the developing myocardium. *J Gen Physiol* **127**, 253-265, doi:10.1085/jgp.200509423 (2006).

- 607 30 Sottas, V. & Abriel, H. Negative-dominance phenomenon with genetic variants of the cardiac sodium channel  
608 Nav1.5. *Biochim Biophys Acta* **1863**, 1791-1798, doi:10.1016/j.bbamcr.2016.02.013 (2016).
- 609 31 Taiakina, V. *et al.* The calmodulin-binding, short linear motif, NSCaTE is conserved in L-type channel  
610 ancestors of vertebrate Cav1.2 and Cav1.3 channels. *PLoS One* **8**, e61765, doi:10.1371/journal.pone.0061765  
611 (2013).
- 612 32 Benmocha, A., Almagor, L., Oz, S., Hirsch, J. A. & Dascal, N. Characterization of the calmodulin-binding  
613 site in the N terminus of CaV1. 2. *Channels (Austin)* **3**, 337-342 (2009).
- 614 33 Fallon, J. L. *et al.* Crystal structure of dimeric cardiac L-type calcium channel regulatory domains bridged by  
615 Ca<sup>2+</sup>-calmodulins. *PNAS* **106**, 5135-5140, doi:10.1073/pnas.0807487106 (2009).
- 616 34 Findeisen, F. *et al.* Calmodulin overexpression does not alter Cav1.2 function or oligomerization state.  
617 *Channels (Austin)* **5**, 320-324, doi:10.4161/chan.5.4.16821 (2011).
- 618 35 Gabelli, S. B. *et al.* Regulation of the Nav1.5 cytoplasmic domain by calmodulin. *Nat Commun* **5**, 5126,  
619 doi:10.1038/ncomms6126 (2014).
- 620 36 Oz, S., Tsemakhovich, V., Christel, C. J., Lee, A. & Dascal, N. CaBP1 regulates voltage-dependent  
621 inactivation and activation of Ca(V)1.2 (L-type) calcium channels. *J Biol Chem* **286**, 13945-13953,  
622 doi:10.1074/jbc.M110.198424 (2011).
- 623 37 Yu, F. H., Yarov-Yarovoy, V., Gutman, G. A. & Catterall, W. A. Overview of Molecular Relationships in  
624 the Voltage-Gated Ion Channel Superfamily. *Pharmacological Reviews* **57**, 387-395, doi:10.1124/pr.57.4.13  
625 (2005).
- 626 38 Catterall, W. A. & Zheng, N. Deciphering voltage-gated Na(+) and Ca(2+) channels by studying prokaryotic  
627 ancestors. *Trends Biochem Sci* **40**, 526-534, doi:10.1016/j.tibs.2015.07.002 (2015).
- 628 39 Evans, T. I. & Shea, M. A. Energetics of calmodulin domain interactions with the calmodulin binding domain  
629 of CaMKII. *Proteins* **76**, 47-61, doi:10.1002/prot.22317 (2009).
- 630 40 Johnson, C. N. Calcium modulation of cardiac sodium channels. *J Physiol*, doi:10.1113/jp277553 (2019).
- 631 41 Johnson, C. N. *et al.* A Mechanism of Calmodulin Modulation of the Human Cardiac Sodium Channel.  
632 *Structure* **26**, 683-694.e683, doi:10.1016/j.str.2018.03.005 (2018).
- 633 42 Kim, J. *et al.* Calmodulin Mediates Ca<sup>2+</sup>Sensitivity of Sodium Channels. *J Biol Chem* **279**, 45004-45012,  
634 doi:10.1074/jbc.m407286200 (2004).
- 635 43 Potet, F., Beckermann, T. M., Kunic, J. D. & George, A. L. Intracellular Calcium Attenuates Late Current  
636 Conducted by Mutant Human Cardiac Sodium Channels. *Circ Arrhythm Electrophysiol* **8**, 933-941,  
637 doi:10.1161/circep.115.002760 (2015).
- 638 44 Shah, V. N. *et al.* Calcium-dependent regulation of the voltage-gated sodium channel hH1: Intrinsic and  
639 extrinsic sensors use a common molecular switch. *PNAS* **103**, 3592-3597, doi:10.1073/pnas.0507397103  
640 (2006).
- 641 45 Matamoros, M. *et al.* Nav1.5 N-terminal domain binding to alpha1-syntrophin increases membrane density  
642 of human Kir2.1, Kir2.2 and Nav1.5 channels. *Cardiovasc Res* **110**, 279-290, doi:10.1093/cvr/cvw009  
643 (2016).
- 644 46 Shy, D. *et al.* PDZ domain-binding motif regulates cardiomyocyte compartment-specific Nav1.5 channel  
645 expression and function. *Circulation* **130**, 147-160, doi:10.1161/circulationaha.113.007852 (2014).
- 646 47 Peter, A. K., Cheng, H., Ross, R. S., Knowlton, K. U. & Chen, J. The costamere bridges sarcomeres to the  
647 sarcolemma in striated muscle. *Prog Pediatr Cardiol* **31**, 83-88, doi:10.1016/j.ppedcard.2011.02.003 (2011).
- 648 48 Petitprez, S. *et al.* SAP97 and dystrophin macromolecular complexes determine two pools of cardiac sodium  
649 channels Nav1.5 in cardiomyocytes. *Circ Res* **108**, 294-304, doi:10.1161/circresaha.110.228312 (2011).
- 650 49 Gavillet, B. *et al.* Cardiac sodium channel Nav1.5 is regulated by a multiprotein complex composed of  
651 syntrophins and dystrophin. *Circ Res* **99**, 407-414, doi:10.1161/01.RES.0000237466.13252.5e (2006).
- 652 50 Dixon, R. E. *et al.* Graded Ca<sup>2+</sup>/calmodulin-dependent coupling of voltage-gated CaV1.2 channels. *eLife* **4**,  
653 doi:10.7554/elife.05608 (2015).
- 654 51 Ito, D. W. *et al.*  $\beta$ -adrenergic-mediated dynamic augmentation of sarcolemmal CaV1.2 clustering and co-  
655 operativity in ventricular myocytes. *J Physiol* **597**, 2139-2162, doi:10.1113/jp277283 (2019).
- 656 52 Pfeiffer, P. *et al.* Clusters of cooperative ion channels enable a membrane-potential-based mechanism for  
657 short-term memory. *eLife* **9**, doi:10.7554/elife.49974 (2020).
- 658 53 Vivas, O., Moreno, C. M., Santana, L. F. & Hille, B. Proximal clustering between BK and CaV1.3 channels  
659 promotes functional coupling and BK channel activation at low voltage. *eLife* **6**, doi:10.7554/elife.28029  
660 (2017).
- 661 54 Decoursey, T. E. Gating currents indicate complex gating of voltage-gated proton channels. *PNAS* **115**, 9057-  
662 9059, doi:10.1073/pnas.1813013115 (2018).

663 55 Gonzalez, C., Koch, H. P., Drum, B. M. & Larsson, H. P. Strong cooperativity between subunits in voltage-  
664 gated proton channels. *Nat Struct Mol Biol* **17**, 51-56, doi:10.1038/nsmb.1739 (2010).  
665 56 Tombola, F., Ulbrich, M. H., Kohout, S. C. & Isacoff, E. Y. The opening of the two pores of the Hv1 voltage-  
666 gated proton channel is tuned by cooperativity. *Nat Struct Mol Biol* **17**, 44-50, doi:10.1038/nsmb.1738 (2010).  
667 57 Zhang, Y., Hartmann, H. A. & Satin, J. Glycosylation influences voltage-dependent gating of cardiac and  
668 skeletal muscle sodium channels. *J Membr Biol* **171**, 195-207, doi:10.1007/s002329900571 (1999).  
669

670

**TABLES**

671

**Table 1. Biophysical properties of sodium currents conducted by wild-type and Y87C Nav1.5**

672

**channels.** Peak sodium current ( $I_{Na}$ ) densities are extracted from the respective IV curves. WT, wild type.

673

Data are presented as mean  $\pm$  SEM and are compared to the respective wild-type values. \*,  $p < 0.05$ ; \*\*,  $p$

674

$< 0.01$ ; \*\*\*,  $p < 0.005$ ; \*\*\*\*,  $p < 0.001$ ; \*\*\*\*\*,  $p < 0.0005$ . Numbers of cells are indicated in parentheses.

675

|               | $I_{Na}$ density           | Steady-state inactivation |                        | Activation              |                           |
|---------------|----------------------------|---------------------------|------------------------|-------------------------|---------------------------|
|               | pA/pF                      | k                         | $V_{1/2}$ (mV)         | k                       | $V_{1/2}$ (mV)            |
| Nav1.5 WT     | -94.8 $\pm$ 9.3 (n=8)      | 5.1 $\pm$ 0.1 (n=17)      | -76.4 $\pm$ 0.7 (n=17) | 7.7 $\pm$ 0.3 (n=10)    | -22.5 $\pm$ 1.0 (n=10)    |
| Y87C          | -28.9 $\pm$ 4.5 (n=11)**** | 5.1 $\pm$ 0.2 (n=12)      | -75.2 $\pm$ 0.6 (n=12) | 9.4 $\pm$ 0.3 (n=11)*** | -16.6 $\pm$ 0.8 (n=11)*** |
| WT + empty v. | -51.1 $\pm$ 13.5 (n=9)**   | 5.0 $\pm$ 0.1 (n=14)      | -75.6 $\pm$ 0.6 (n=14) | 8.2 $\pm$ 0.2 (n=10)    | -19.6 $\pm$ 1.1 (n=10)    |
| WT + Y87C     | -26.0 $\pm$ 4.3 (n=8)****  | 5.2 $\pm$ 0.2 (n=10)      | -75.7 $\pm$ 0.8 (n=10) | 8.9 $\pm$ 0.3 (n=8)**   | -19.3 $\pm$ 0.6 (n=8)*    |

676

677

**Table 2. Biophysical properties of sodium currents conducted by wild-type, R104W, and R121W**

678

**Nav1.5 channels.** Peak sodium current ( $I_{Na}$ ) densities are extracted from the respective IV curves. WT, wild

679

type. Data are presented as mean  $\pm$  SEM and are compared to the respective wild-type values. \*,  $p < 0.05$ ;

680

\*\*\*,  $p < 0.01$ ; \*\*,  $p < 0.005$ ; \*\*\*\*,  $p < 0.001$ ; \*\*\*\*\*,  $p < 0.0005$ . Numbers of cells are indicated in parentheses.

681

|               | $I_{Na}$ density          | Steady-state inactivation |                          | Activation            |                          |
|---------------|---------------------------|---------------------------|--------------------------|-----------------------|--------------------------|
|               | pA/pF                     | k                         | $V_{1/2}$ (mV)           | k                     | $V_{1/2}$ (mV)           |
| Nav1.5 WT     | -86.6 $\pm$ 11.4 (n=9)    | 5.3 $\pm$ 0.2 (n=11)      | -73.2 $\pm$ 0.5 (n=11)   | 6.6 $\pm$ 0.2 (n=9)   | -22.7 $\pm$ 0.6 (n=9)    |
| R104W         | ND (n=7)                  | n/a                       | n/a                      | n/a                   | n/a                      |
| R121W         | ND (n=7)                  | n/a                       | n/a                      | n/a                   | n/a                      |
| WT + empty v. | -38.4 $\pm$ 3.4 (n=5)**   | 4.8 $\pm$ 0.1 (n=5)       | -74.4 $\pm$ 0.9 (n=5)    | 6.9 $\pm$ 0.3 (n=5)   | -20.0 $\pm$ 0.2 (n=5)**  |
| WT + R104W    | -23.1 $\pm$ 4.6 (n=9)**** | 5.4 $\pm$ 0.2 (n=11)      | -75.9 $\pm$ 0.5 (n=11)** | 7.5 $\pm$ 0.3 (n=7)*  | -19.5 $\pm$ 0.7 (n=7)**  |
| WT + R121W    | -46.9 $\pm$ 3.4 (n=12)**  | 5.2 $\pm$ 0.2 (n=6)       | -72.5 $\pm$ 1.3 (n=6)    | 7.4 $\pm$ 0.3 (n=10)* | -20.3 $\pm$ 0.5 (n=10)** |

682

683



684

SUPPLEMENTARY FIGURES

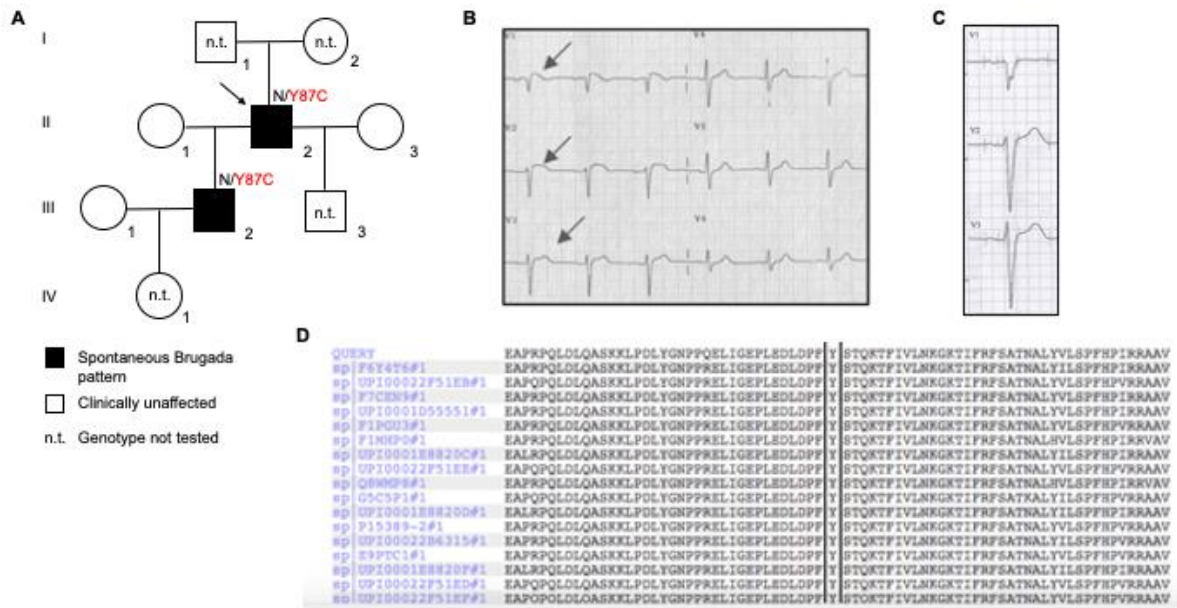

685

686 **Supplementary Figure 1.** Prevalence of Brugada Syndrome and the Y87C Nav1.5 variant in the Russian proband family. (A)  
 687 Pedigree of the proband family. The proband is marked with a black arrow. Black squares indicate family members with BrS; empty  
 688 symbols indicate clinically unaffected family members. n.t: genotype not tested. (B) ECG from proband II.2 recorded at 49 years  
 689 old shows a spontaneous Brugada pattern. Heart rate was 75 bpm, QTc-interval 383 ms, and PR-interval 240 ms. An ST-elevation  
 690 > 2mm is observed in V1-V3 with a negative T-wave in V1. (C) ECG from III.3 recorded at 13 years old shows no Brugada  
 691 pattern. ECG registered at 50 mm/s, amplitude 10 mm/mV. (D) Multiple sequence alignment showing the highly conserved p.87Y  
 692 position in Nav1.5 across different species.

693

694 **Supplementary Figure 2.** Na<sub>v</sub>1.5 WT- and variant-encoding mRNA expression levels were similar. (A) RT-qPCR data of *SCN5A*  
 695 mRNA expression in TsA-201 cells transiently transfected with WT-, Y87C-, R104W-, and R121W-Na<sub>v</sub>1.5-encoding cDNA  
 696 normalized to *GAPDH* showed no difference between the conditions.

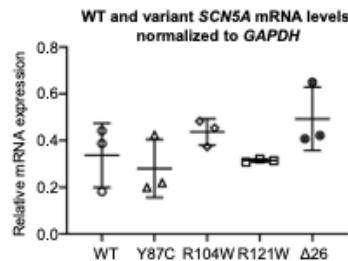

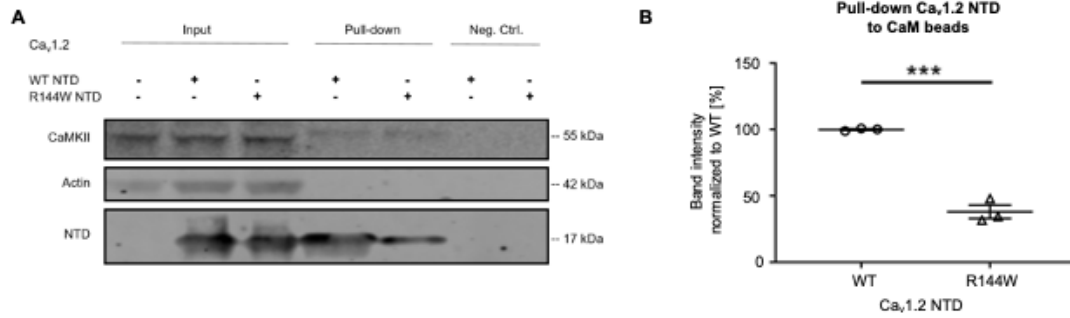

697

698  
699  
700  
701

**Supplementary Figure 3. The R144W mutation in Ca<sub>v</sub>1.2 weakens the Ca<sub>v</sub>1.2 NTD-CaM interaction. (A)** Representative western blot of three independent CaM-Ca<sub>v</sub>1.2 NTD pull-down experiments performed with 360 μg TsA-201 cell lysate. Full blots are shown in Supplementary Figure 7. **(B)** Relative protein band intensity of Ca<sub>v</sub>1.2 NTD normalized to endogenous CaMKII. The Ca<sub>v</sub>1.2-WT NTD band intensities are normalized to 1. Data are presented as mean ± SEM. \*\*\*,  $p < 0.001$ .

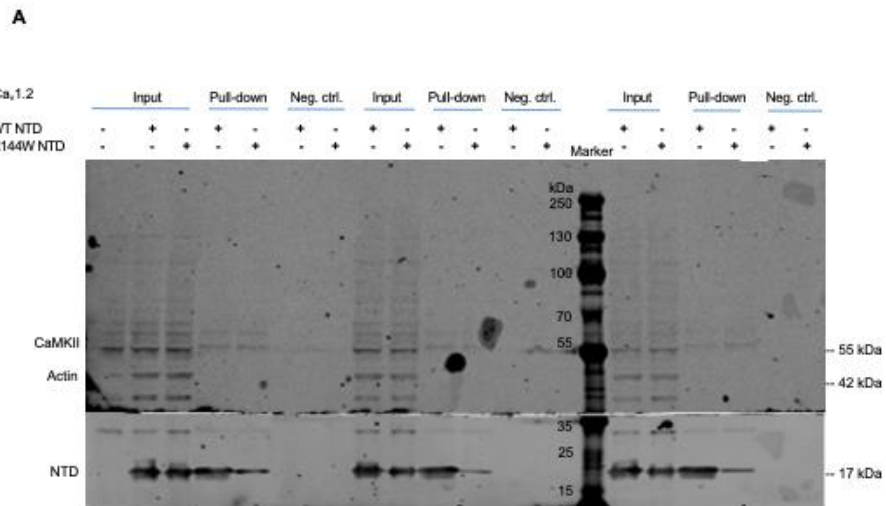

702

703  
704

**Supplementary Figure 4. Full western blots of three independent biotinylation experiments in TsA-201 cells transiently transfected with Na<sub>v</sub>1.5 WT, Y87C, R104W, and R121W.**

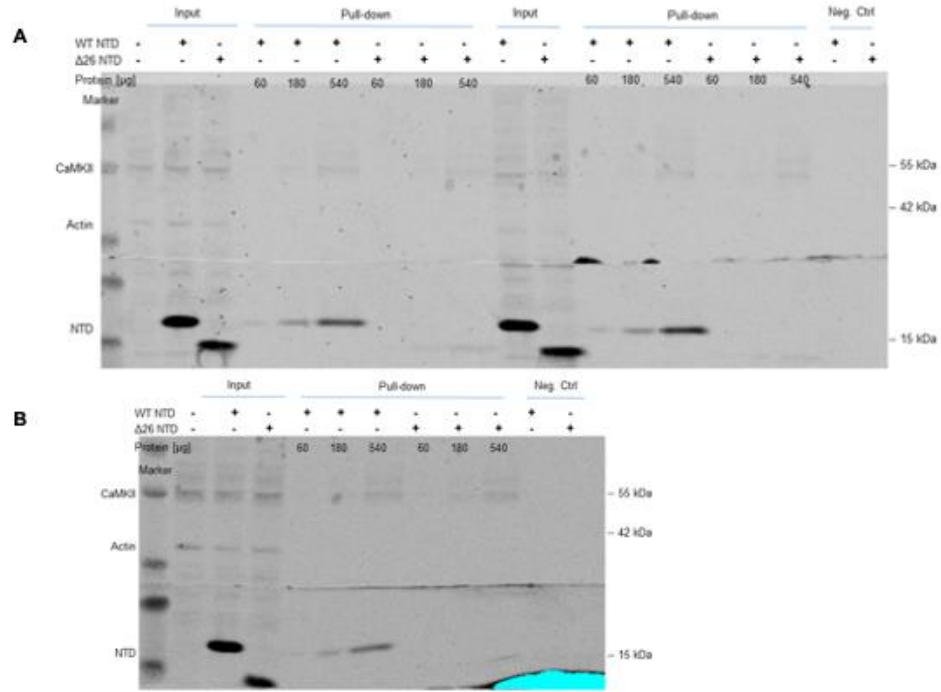

705

706

707

708

**Supplementary Figure 5.** Full western blots of three independent CaM pull-down experiments in TsA-201 cells transiently transfected with S-tagged Na<sub>v</sub>1.5 WT and Δ26 NTD using various amounts of protein.

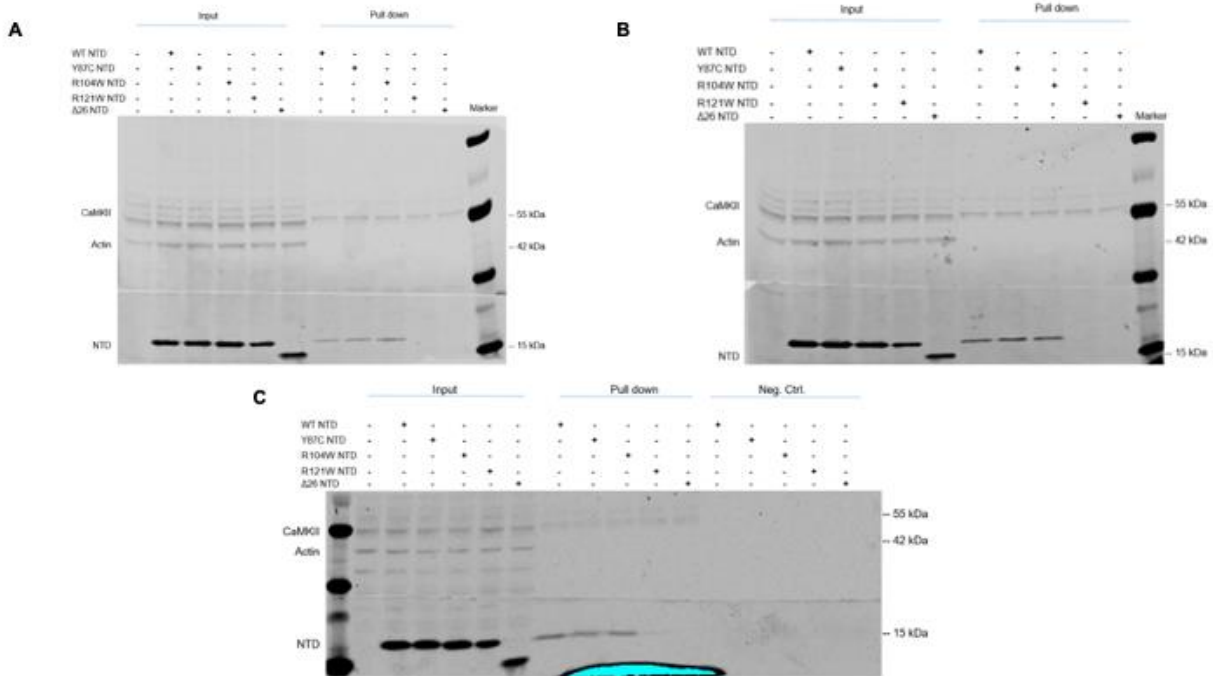

709

710

711

**Supplementary Figure 6.** Full western blots of three independent CaM pull-down experiments with lysates equivalent to 360 μg per condition from TsA-201 cells transiently transfected with S-tagged Na<sub>v</sub>1.5 WT, Y87C, R104W, R121W, and Δ26 NTD.

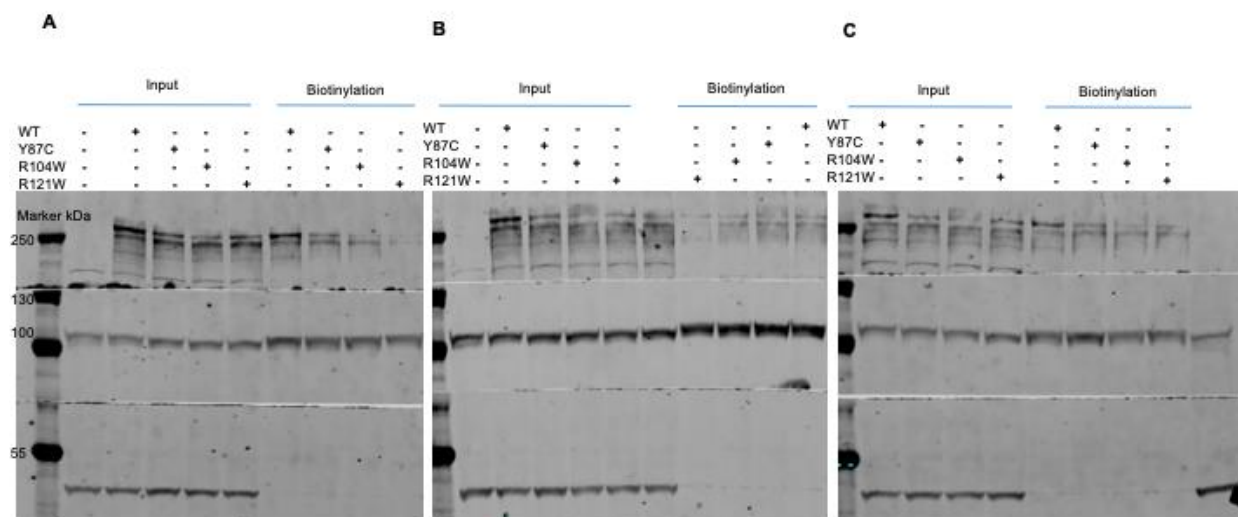

712

713

714

**Supplementary Figure 7.** Full western blots of three independent CaM pull-down experiments with lysates equivalent to 360  $\mu$ g per condition from TsA-201 cells transiently transfected with S-tagged  $Ca_v1.2$  WT and R144W NTD.
